1 **The yeast endocytic early/sorting compartment exists as an independent**  
2 **sub-compartment within the *trans*-Golgi network**

3 **Authors**

4 Junko Y. Toshima<sup>1,2\*</sup>, Ayana Tsukahara<sup>2</sup>, Makoto Nagano<sup>2</sup>, Takuro Tojima<sup>3</sup>, Daria E.  
5 Siekhaus<sup>4</sup>, Akihiko Nakano<sup>3</sup>, and Jiro Toshima<sup>2\*</sup>

6

7 **Affiliations**

8 <sup>1</sup>School of Health Science, Tokyo University of Technology, 5-23-22 Nishikamata,  
9 Ota-ku, Tokyo 144-8535, Japan

10 <sup>2</sup>Department of Biological Science and Technology, Tokyo University of Science, 6-3-1  
11 Niijyuku, Katsushika-ku, Tokyo 125-8585, Japan

12 <sup>3</sup>Live Cell Super-Resolution Imaging Research Team, RIKEN Center for Advanced  
13 Photonics, Wako, Saitama 351-0198, Japan

14 <sup>4</sup>Institute of Science and Technology Austria, Am Campus 1, A-3400 Klosterneuburg,  
15 Austria

16

17 \*Corresponding authors:

18 Telephone 81-3-5876-1501, Fax 81-3-5876-1464, email [jtosiscb@rs.tus.ac.jp](mailto:jtosiscb@rs.tus.ac.jp)

19 Telephone 81-3-6424-2106, Fax 81-3-6424-2112, email [toshimajk@stf.teu.ac.jp](mailto:toshimajk@stf.teu.ac.jp)

20

21 Running title: Yeast early/sorting compartment within the TGN

22 **Abstract**

23 Although budding yeast has been extensively used as a model organism for studying  
24 organelle functions and intracellular vesicle trafficking, whether it possesses an  
25 independent endocytic early/sorting compartment that sorts endocytic cargos to the  
26 endo-lysosomal pathway or the recycling pathway has long been unclear. The structure  
27 and properties of the endocytic early/sorting compartment differ significantly between  
28 organisms; in plant cells the *trans*-Golgi network (TGN) serves this role, whereas in  
29 mammalian cells a separate intracellular structure performs this function. The yeast  
30 syntaxin homolog Tlg2p, widely localizing to the TGN and endosomal compartments,  
31 is presumed to act as a Q-SNARE for endocytic vesicles, but which compartment is the  
32 direct target for endocytic vesicles remained unanswered. Here we demonstrate by  
33 high-speed and high-resolution 4D imaging of fluorescently labeled endocytic cargos  
34 that the Tlg2p-residing compartment within the TGN functions as the early/sorting  
35 compartment. After arriving here, endocytic cargos are recycled to the plasma  
36 membrane or transported to the yeast Rab5-residing endosomal compartment through  
37 the pathway requiring the clathrin adaptors GGAs. Interestingly, Gga2p predominantly  
38 localizes at the Tlg2p-residing compartment, and the deletion of GGAs has little effect  
39 on another TGN region where Sec7p is present but suppresses dynamics of the  
40 Tlg2-residing early/sorting compartment, indicating that the Tlg2p- and Sec7p-residing  
41 regions are discrete entities in the mutant. Thus, the Tlg2p-residing region seems to  
42 serve as an early/sorting compartment, and function independently of the  
43 Sec7p-residing region within the TGN.

## 44 **Introduction**

45           Clathrin-mediated endocytosis is the best-characterized type of endocytosis in  
46 eukaryotic cells and plays crucial roles in many physiological processes (Kaksonen and  
47 Roux, 2018; Mettlen et al., 2018). After leaving from the plasma membrane (PM), a  
48 clathrin-coated vesicle (CCV) is uncoated and transported to the early/sorting  
49 compartment (Cullen and Steinberg, 2018; Valencia et al., 2016). In yeast the molecular  
50 mechanisms regulating this CCV formation and internalization have been well  
51 characterized, but it still remains unclear how and where uncoated endocytic vesicles  
52 are delivered to the early/sorting compartment. A recent study has reported that budding  
53 yeast lacks distinct early endosomes and that the Sec7p-residing TGN is the first  
54 destination for endocytic traffic, functioning as an early endosome-like compartment  
55 (Day et al., 2018). However, several other reports have indicated that yeast has two  
56 distinct types of endosomal compartments, one containing yeast Rab5 (Vps21p) and the  
57 other containing yeast Rab7 (Lachmann et al., 2012). Additionally, we have previously  
58 demonstrated that endocytosed cargos are rarely transported to the Sec7p-residing TGN  
59 compartment (Toshima et al., 2014). These inconsistent observations are likely  
60 attributable to technical difficulties in visualizing the cargo-sorting process, and have  
61 complicated our understanding of the properties of the yeast early/sorting compartment.

62           The yeast R-SNAREs (soluble N-ethylmaleimide-sensitive factor attachment  
63 protein receptors), Snc1p and Snc2p, are yeast orthologs of vesicle-associated  
64 membrane protein (VAMP), and were originally identified as proteins required for the  
65 fusion of secretory vesicles with the PM via Q-SNAREs Sso1p and Sso2p (Gerst et al.,

66 1992; Protopopov et al., 1993). Snc1p contains a conserved endocytosis signal, which is  
67 recognized by the clathrin adaptor protein and is thereby endocytosed with the CCV  
68 (Grote et al., 2000; Gurunathan et al., 2000). Disruption of this endocytic signal causes  
69 defects in the internalization of Snc1p itself and other endocytic cargos, such as the  
70 fluorescent endocytic tracer FM4-64 and the  $\alpha$ -factor receptor Ste2p (Gurunathan et al.,  
71 2000). This result suggests that Snc1p and Snc2p function as R-SNAREs in endocytic  
72 pathways by interacting with Q-SNAREs. Tlg1p and Tlg2p have high homology to  
73 syntaxins, and bind Snc1p and Snc2p (Abeliovich et al., 1998; Holthuis et al., 1998a;  
74 Paumet et al., 2001). Since these Q-SNAREs are localized to the TGN and putative  
75 early endosomes, these proteins have been considered to play a role in transport  
76 between the TGN and endosomal compartments (Holthuis et al., 1998b; Lewis et al.,  
77 2000). Tlg1p and Tlg2p are also known to co-localize with endocytosed FM4-64 soon  
78 after internalization (Abeliovich et al., 1998; Dobzinski et al., 2015). From these  
79 observations, it has been suggested that Tlg1p and/or Tlg2p are Q-SNAREs mediating  
80 fusion between endocytic vesicles and early endosomal compartments.

81         Recent studies using high-speed, high-resolution, and four-dimensional (4D)  
82 time-lapse imaging have revealed that in yeast intra-Golgi cargo trafficking from the  
83 early Golgi to the TGN is mediated by cisternal maturation (Kurokawa et al., 2019;  
84 Losev et al., 2006; Matsuura-Tokita et al., 2006). Detailed localization analyses of  
85 various Golgi/TGN-resident proteins have shown that the Golgi-TGN transition  
86 gradually proceeds with sequential recruitment of these proteins (Tojima et al., 2019).  
87 In this process, Tlg2p appears at the TGN earlier than Sec7p, a marker of the



88 early-to-late TGN, and also disappears before Sec7p from the TGN (Tojima et al.,  
89 2019). This observation suggests that endocytic vesicles containing Snc1p R-SNARE  
90 might target the TGN compartment where Tlg2p resides although this has not yet been  
91 proven directly.

92           In our previous study, we demonstrated that fluorescently labeled endocytic  
93 cargo, yeast mating pheromone  $\alpha$ -factor (Alexa- $\alpha$ -factor), accumulates at clathrin  
94 -coated pits, and is internalized with the CCV (Toshima et al., 2006). Within 5 min after  
95 Alexa- $\alpha$ -factor internalization, Alexa- $\alpha$ -factor-labeled endosomal compartments  
96 become co-localized with the yeast Rab5, Vps21p, and fuse with each other, resulting in  
97 the formation of enlarged endosomal compartments (Toshima et al., 2014). However it  
98 has been unclear whether Alexa- $\alpha$ -factor is directly transported to the Vps21p-residing  
99 compartment from the endocytic vesicle. We recently showed that although endocytosis  
100 is not essential, post-Golgi vesicle transport is crucial for Vps21p-mediated endosome  
101 formation (Nagano et al., 2019). Thus, as the TGN seems to play a key role in endocytic  
102 cargo transport, it is important to clarify how the TGN regulates endocytic cargo  
103 transport to the Vps21p-residing compartment. Here we succeeded in simultaneous  
104 triple-color and 4D (3D plus time) observation to visualize endocytic cargo together  
105 with the Tlg2p-residing region by super-resolution confocal live imaging microscopy  
106 (SCLIM) (Kurokawa and Nakano, 2020; Tojima et al., 2022). We show that  
107 Alexa- $\alpha$ -factor endocytosed by the CCV is incorporated directly into the Tlg2p-residing  
108 sub-compartment within the TGN, and then moves on from there when another  
109 TGN-representative protein Sec7p appears. Such visualization along with genetic

110 manipulations of endocytic pathway components suggest that the Tlg2p-residing  
111 sub-compartment within the TGN is the primary endocytic accepting region that serves  
112 as an early/sorting compartment that sorts endocytosed cargo to further destinations.  
113  
114

115 **Results**

116 **Endocytosed  $\alpha$ -factor is transported to the Tlg2p-residing sub-compartment**  
117 **within the TGN**

118 Sec7p, one of the yeast guanine-nucleotide exchange factors (GEFs) for Arf  
119 GTPases, is known as a representative TGN marker (Casler et al., 2021; Kurokawa et  
120 al., 2019). A previous study has reported that the Sec7p-residing TGN compartment is  
121 the first destination for endocytic traffic and functions as an early endosome-like sorting  
122 compartment (Day et al., 2018). However, since Tlg2p, which is a putative Q-SNARE  
123 for the endocytic vesicle (Abeliovich et al., 1998; Paumet et al., 2001; Seron et al.,  
124 1998) exhibits temporal localization patterns distinct from Sec7p (Tojima et al., 2019),  
125 the exact timing and locus of endocytic vesicle targeting remained ambiguous. As a first  
126 step towards clarifying this, we compared the localization of Alexa594-labeled  $\alpha$ -factor  
127 (A594- $\alpha$ -factor) with Tlg2p and Sec7p. The yeast Golgi and TGN are a highly dynamic  
128 organelles whose cisternae rapidly change their composition with an approximate  
129 maturation rate of less than 1 min (Matsuura-Tokita et al., 2006; Tojima et al., 2019).  
130 Therefore, we defined "overlapping" as a distance of less than 129 nm (2 pixels)  
131 between two peaks of GFP and mCherry/Alexa594 intensity in 2D imaging. At 5 min  
132 after internalization, A594- $\alpha$ -factor began to accumulate at several intracellular puncta,  
133 although the majority still remained on the PM (Fig. 1A). GFP-fused Tlg2p was  
134 detected in several non-uniform structures, such as puncta or tubules, with different  
135 sizes and shapes (Fig. 1, A and F), and ~71% of them clearly overlapped with  
136 A594- $\alpha$ -factor-labeled puncta at 5 min after A594- $\alpha$ -factor internalization (Fig. 1B).

137 After 10 min, A594- $\alpha$ -factor-labeled puncta had increased in both number and  
138 fluorescent intensity, and  $\sim 77.7\%$  of GFP-Tlg2p overlapped with them (Fig. 1, A and B).  
139 In contrast, Sec7-GFP, which was also detected as several punctate structures, did not  
140 show significant overlap with A594- $\alpha$ -factor signals either at 5 min ( $26.0 \pm 9.4\%$ ) or 10  
141 min ( $22.7 \pm 6.0\%$ ) after A594- $\alpha$ -factor internalization (Fig. 1B; Fig. S1A). After 20 min,  
142 the number of A594- $\alpha$ -factor-labeled puncta decreased as the  $\alpha$ -factor was transported  
143 to the vacuole via the pre-vacuolar compartments (PVC) (Toshima et al., 2014) (Fig.  
144 1A). At this time point, most of the A594- $\alpha$ -factor was localized at the puncta around  
145 the vacuole and vacuole, and substantial GFP-Tlg2p was also localized at these puncta  
146 labeled by A594- $\alpha$ -factor ( $47.7 \pm 3.9\%$ ), whereas Sec7-GFP was rarely localized there  
147 ( $5.0 \pm 5.4\%$ ) (Fig. 1, A and B; Fig. S1A). These observations suggest the localization of  
148 GFP-Tlg2p at the early-to-late stage endosomes, as well as the TGN. We also compared  
149 the localization of A594- $\alpha$ -factor with Tlg1p, another putative Q-SNARE for the  
150 endocytic vesicle, that is reported to localize mainly at the early endosomes and  
151 partially at the TGN (Holthuis et al., 1998a). Similar to GFP-Tlg2p, GFP-Tlg1p highly  
152 overlapped with A594- $\alpha$ -factor-labeled puncta ( $74.4 \pm 5.9\%$ ) at 5 min after  
153 A594- $\alpha$ -factor internalization (Fig. 1B and Fig. S1B). However, after 10 min the  
154 fraction of A594- $\alpha$ -factor overlapping with GFP-Tlg1p decreased to  $\sim 51.1\%$ , and  
155 further decreased to  $\sim 26.1\%$  after 20 min (Fig. 1B and Fig. S1B). GFP-Tlg1p signals  
156 overlapped well with mCherry-Tlg2p-labeled puncta, except at puncta around the  
157 vacuole (Fig. S1C), suggesting that Tlg1p localizes at the TGN and early-stage  
158 endosomes, as described previously (Holthuis et al., 1998a). To confirm that  $\alpha$ -factor

159 overlaps with both Tlg1p and Tlg2p at the TGN just after internalization, we conducted  
160 triple color imaging with GFP-Tlg1p, mCherry-Tlg2p, and Alexa647-labeled  $\alpha$ -factor  
161 (A647- $\alpha$ -factor). As expected, the majority of endocytosed A647- $\alpha$ -factor localized at  
162 the compartments where both Tlg1p and Tlg2p are present at 5 min after internalization  
163 (Fig. S1D). These observations suggest that  $\alpha$ -factor is transported to a region distinct  
164 from the Sec7p-residing TGN compartment where Tlg1p and Tlg2p localize, and then  
165 from there moves to the PVC via the endocytic pathway.

166         A recent study has demonstrated that the timing of Tlg2p recruitment to the  
167 TGN is earlier than that of Sec7p (Tojima et al., 2019). To examine whether Tlg2p  
168 localizes at a separate region from the Sec7p-residing region within the TGN, we  
169 performed simultaneous dual-color 3D analysis of these proteins using SCLIM. As  
170 shown in Figure 1C, we observed two types of GFP-Tlg2p localization, one at regions  
171 in which only GFP-Tlg2p was visible, and the other at locations adjacent to the  
172 Sec7p-residing region. Previous studies have reported that Tlg2p cycles between late  
173 Golgi and endosomal compartments, and thus localizes to both compartments (Lewis et  
174 al., 2000). It has also been shown that at the TGN Tlg2p appears earlier than Sec7p, and  
175 also disappears before Sec7p from the TGN (Tojima et al., 2019). Therefore, we  
176 considered the structures where only GFP-Tlg2p localized to be either an endosomal  
177 compartment or the TGN compartment before Sec7-mCherry came in. Localization of  
178 GFP-Tlg2p and Sec7-mCherry at the TGN was analyzed by line scan using the xy, xz,  
179 or yz planes, which revealed that GFP-Tlg2p signal partially overlaps with the TGN  
180 compartment labeled by Sec7-mCherry, but is mostly spatially separated (Fig. 1D;

181 Video 1). This observation suggests that the Tlg2p-residing structure exists as a  
182 sub-compartment that is distinct from the Sec7p-residing structure within the TGN  
183 (hereafter referred to as Tlg2p or Sec7p sub-compartment, respectively). We next  
184 performed simultaneous triple-color 3D imaging to determine whether  $\alpha$ -factor  
185 localized to the Tlg2p or the Sec7p sub-compartment. For triple-color imaging with  
186 GFP-Tlg2p and Sec7-iRFP, we labeled  $\alpha$ -factor with pHrode Red (pHrode- $\alpha$ -factor),  
187 whose fluorescent wavelength can be separated from those of GFP and iRFP.  
188 pHrode- $\alpha$ -factor clearly labeled endocytic compartments after internalization to the  
189 same extent as A594- $\alpha$ -factor (Fig. 1E). 3D SCLIM imaging, similar to the 2D analysis,  
190 revealed that at 5 min after internalization pHrode- $\alpha$ -factor signals overlapped with the  
191 GFP-Tlg2p signals, around half of which were adjacent to Sec7-iRFP-labeled regions  
192 (Fig. 1E). Line scan analyses revealed that the peak of pHrode- $\alpha$ -factor signal coincides  
193 with that of GFP-Tlg2p signal rather than Sec7p (Fig. 1F; Video 1). To further  
194 understand the spatiotemporal relationship between the Tlg2p and Sec7p  
195 sub-compartments during  $\alpha$ -factor transport, we performed 4D (3D plus time) imaging  
196 by SCLIM. Consistent with the previous study (Tojima et al., 2019), we observed that  
197 Sec7-iRFP appeared in the vicinity of GFP-Tlg2p, and then the signal of GFP-Tlg2p  
198 gradually disappeared, while that of Sec7-iRFP increased (Fig. 1G; Video 2). During  
199 this process, pHrodo- $\alpha$ -factor became joined to the pre-existing Tlg2p sub-compartment  
200 and stayed there for several tens of seconds, and then disappeared soon after Sec7-iRFP  
201 arrival (Fig. 1G; Video 2). Magnified images from the time series shown in Figure 1G  
202 indicate that pHrodo- $\alpha$ -factor already co-localizes with GFP-Tlg2p at the time when

203 Sec7p shows up (Fig. 1H). This observation suggests that the Tlg2p sub-compartment  
204 adjacent to the Sec7p sub-compartment plays a specific role in the endocytic pathway.

205

## 206 **Endocytic vesicles interact directly with the Tlg2p-residing sub-compartment**

207 Co-localization of  $\alpha$ -factor with the Tlg2p sub-compartment at the early stage  
208 of endocytosis motivated us to examine if the Tlg2p sub-compartment is a direct target  
209 of endocytic vesicles. We had shown previously that endocytic vesicles labeled with the  
210 endocytic vesicle markers Sla1- or Abp1-GFP, moved to the A594- $\alpha$ -factor-labeled  
211 compartment, which is considered to be the early endosome (Toshima et al., 2006). Our  
212 current simultaneous dual-color 2D imaging showed that when Abp1-mCherry-labeled  
213 vesicles began moving, they traveled to Tlg2p sub-compartments and disappeared after  
214 arrival there (Fig. 2A; Video 3) We then utilized the *arp3-D11A* mutant, which shows a  
215 delay in endocytic vesicle formation and a severe defect in vesicle internalization  
216 (Martin et al., 2005), to examine whether we could observe any Tlg2p  
217 sub-compartments approaching the endocytic site when endocytic vesicle movement is  
218 blocked. As described previously, in the *arp3-D11A* mutant Abp1p's lifetime was  
219 remarkably extended, indicating that the formation and internalization of endocytic  
220 vesicles were also severely impaired (Fig. 2B; Video 3). Similar to the previous  
221 findings obtained when A594- $\alpha$ -factor was used as an early endosome marker (Toshima  
222 et al., 2006), the Tlg2p sub-compartment was observed to approach and make contact  
223 with the Abp1-mCherry-labeled vesicle remaining on the PM, and then disappeared  
224 (Fig. 2B; Video 3).

225           To further examine the contact between endocytic vesicles and the Tlg2p  
226 sub-compartment, we performed dual-color 4D observation by SCLIM. As shown in  
227 Figures 2C and 2D, we found that several Abp1-mCherry patches attach to the Tlg2p  
228 sub-compartment in both wild-type cells and those from the *arp3-D11A* mutant.  
229 Time-laps imaging of a wild type cell revealed that an Abp1-mCherry-labeled endocytic  
230 vesicle appeared, stayed for 3-6 sec around the Tlg2p sub-compartment, and then  
231 disappeared (Fig. 2E; Video 4). In contrast, in the *arp3-D11A* mutant, an  
232 Abp1-mCherry-labeled vesicle stayed around the Tlg2p sub-compartment more than 10  
233 sec and then disappeared (Fig. 2F; Video 5). Because the temporal resolution of SCLIM  
234 is 3 sec in this observation, we were unable to track all the Abp1-mCherry signals until  
235 their disappearance. The timing of dissociation of Abp1p from the endocytic vesicles  
236 depends on the speed of actin depolymerization around the vesicle (Toret et al., 2008)  
237 and thus is not constant: some Abp1p signals disappear after reaching the Tlg2p  
238 sub-compartment, but others disappear before. Despite this, we observed similar  
239 dynamics in at least 18% of Abp1-mCherry-labeled vesicles internalized in wild-type  
240 cells (Fig. 2H). We also utilized Vps21p as a marker of another endosomal  
241 compartment. In contrast to the Tlg2p sub-compartment, GFP-Vps21-labeled  
242 endosomal compartments often fused with each other, forming larger structures, and  
243 Abp1-mCherry-labeled vesicles rarely coalesced into them (Fig. 2, G and H). To further  
244 test if the Tlg2p sub-compartment interacting with Abp1-mCherry-labeled vesicles was  
245 within the TGN, we performed triple-color 4D imaging including Sec7-iRFP and found  
246 that the Abp1-mCherry-labeled vesicle stayed and disappeared on the Tlg2p



247 sub-compartment adjacent to the Sec7p sub-compartment (Fig. 2, I and J). These results  
248 support the idea that the initial destination of endocytic vesicles is the Tlg2p  
249 sub-compartment.

250

251  **$\alpha$ -factor transported to the Tlg2p sub-compartment moves to the Vps21p-residing**  
252 **endosome, together with Tlg2p**

253 We previously demonstrated that Vps21p localizes predominantly at  
254 endosomal compartments (Toshima et al., 2014). Co-localization between  
255 A594- $\alpha$ -factor and GFP-Tlg2p at the early-to-late stage of the endocytic pathway  
256 prompted us to investigate whether Vps21p also localizes to the Tlg2p  
257 sub-compartment. To this end, we imaged GFP-Tlg2p and mCherry-Vps21p  
258 simultaneously by 2D epi-fluorescence microscopy, and found that ~53% of GFP-Tlg2p  
259 signals overlaps with mCherry-Vps21p (Fig. 3, A and B). This overlapping localization  
260 was observed at the Vps21p-residing smaller structures (Fig. 3A, white arrow heads)  
261 and the larger Tlg2p sub-compartments (Fig. 3A, yellow arrow heads). We also found  
262 that ~26% of the Sec7-mCherry-labeled sub-compartment overlapped with  
263 GFP-Vps21p signals, suggesting that Vps21p partially localizes around the TGN as well  
264 as in endosomal compartments. Interestingly, we observed that  
265 mCherry-Vps21p-labeled vesicles associate with and move around the Tlg2p  
266 sub-compartment over 10 seconds, and line scan analyses revealed that the Vps21p  
267 signal well overlaps with the GFP-Tlg2p signal (Fig. 3C). Triple-color 3D imaging  
268 demonstrated that mCherry-Vps21p signals often made contact with the Tlg2p

269 sub-compartment adjacent to the Sec7p sub-compartment (Fig. 3, D and E; Video 6).  
270 This interaction seemed to be transient because mCherry-Vps21p attached to the Tlg2p  
271 sub-compartment for several tens of seconds and then became detached from there (Fig.  
272 3F; Video 6). Additionally, we observed that small GFP-Tlg2p signals moved together  
273 with mCherry-Vps21p when the mCherry-Vps21p-labeled puncta detached from the  
274 Tlg2p sub-compartment (Fig. 3G; Video 6). Thus, the Vps21p-residing structures  
275 appear to transiently contact the Tlg2p sub-compartment, transporting Tlg2p to the  
276 Vps21p-residing compartment.

277 We next conducted 2D imaging using GFP-Tlg2p, mCherry-Vps21p and  
278 A647- $\alpha$ -factor to determine the order of  $\alpha$ -factor delivery. At 5-20 min after  
279 internalization, the rate of A647- $\alpha$ -factor overlapping with GFP-Tlg2p and/or  
280 mCherry-Vps21p changed in a time-dependent manner (Fig. 3, H and I). We conducted  
281 quantitative analysis, categorizing A647- $\alpha$ -factor localization as overlapping with  
282 Tlg2p only ( $\alpha$ -factor and Tlg2p), with Vps21p only ( $\alpha$ -factor and Vps21p), with both of  
283 them ( $\alpha$ -factor & Tlg2p & Vps21p), or as  $\alpha$ -factor alone. This revealed that the overlap  
284 of  $\alpha$ -factor signals with GFP-Tlg2p was highest at 5 min and then gradually decreased  
285 from 10 to 20 min, whereas that with mCherry-Vps21p increased from 5 to 20 min (Fig.  
286 3, H and I). This result suggested that  $\alpha$ -factor transported to the Tlg2p  
287 sub-compartment moves to the Vps21p-residing compartment in the endocytic pathway.  
288 At 15 min after internalization,  $\alpha$ -factor mostly reached the PVC (Toshima et al., 2014),  
289 and at the same time a portion of the GFP-Tlg2p signals was still co-localized with  
290 A647- $\alpha$ -factor and mCherry-Vps21p (Fig. 3H), suggesting that Tlg2p exits the TGN

291 and is then transported to the PVC via the Vps21p-residing compartment. To confirm  
292 this, we examined if Tlg2p accumulates in endosomal intermediates observed in the  
293 mutant lacking the yeast Rab5 paralogs, *VPS21* and *YPT52* (Toshima et al., 2014). As  
294 shown previously, A594- $\alpha$ -factor accumulated in multiple endosomal intermediates in  
295 the *vps21 $\Delta$  ypt52 $\Delta$*  mutant, and Tlg2p was well localized there (Fig. 3, J and K). It is  
296 noteworthy that the number of Tlg2p puncta increased (Fig. 3J) while that of Sec7p  
297 puncta did not change in the mutant (Toshima et al., 2014). These observations support  
298 the idea that Tlg2p is transported to the PVC via the Vps21p-residing compartment.

299

### 300 **GGA adaptors are required for transport of endocytic cargo from the Tlg2p** 301 **sub-compartment to the Vps21p-residing compartment**

302 A previous study has reported that after reaching the TGN,  $\alpha$ -factor is  
303 transported to the PVC, dependent on the TGN-resident Golgi-associated,  $\gamma$ -adaptin ear  
304 containing, Arf binding protein (GGA) adaptors, Gga1p and Gga2p (Day et al., 2018).  
305 GGA adaptors were also shown to mediate TGN-to endosome traffic (Black and  
306 Pelham, 2000). Therefore, we speculated that deletion of *GGA1* and *GGA2* might cause  
307 accumulation of  $\alpha$ -factor at the TGN compartment where  $\alpha$ -factor is located. In  
308 agreement with previous observations, endocytosed A594- $\alpha$ -factor in the *gga1 $\Delta$  gga2 $\Delta$*   
309 mutant accumulated at several puncta in the cytoplasm at 20 min after internalization,  
310 whereas in wild-type cells it was mostly transported to the vacuole at this time (Fig. 4A).  
311 Accumulation of A594- $\alpha$ -factor was also observed in cells lacking epsin-related  
312 Ent3p/5p (Nagano et al., 2019), but not observed in cells lacking Apl4p, a subunit of the

313 AP-1 complex (Fig. 4A), indicating that the AP-1-dependent pathway is not essential  
314 for sorting of  $\alpha$ -factor to the vacuole. By comparing the localization of A594- $\alpha$ -factor  
315 with the Sec7-GFP-labeled sub-compartment, we found that the regions where  
316 A594- $\alpha$ -factor accumulated differed between the mutants (Fig. 4B). In the  
317 *gga1* $\Delta$  *gga2* $\Delta$  mutant, localization of Sec7-GFP overlapping with A594- $\alpha$ -factor at this  
318 resolution ( $< 130$  nm) was markedly increased to  $55.7 \pm 5.8\%$ , whereas it was only  
319 slightly increased in the *ent3* $\Delta$  *ent5* $\Delta$  mutant ( $11.7 \pm 4.1\%$ ), relative to that in wild-type  
320 cells ( $2.6 \pm 2.3\%$ ) at 20 min after A594- $\alpha$ -factor internalization (Fig. 4, B and C). These  
321 results indicate a requirement for GGA adaptors in the export of A594- $\alpha$ -factor from  
322 the regions near the Sec7-GFP-labeled TGN compartment.

323         Since A594- $\alpha$ -factor is first transported to the Tlg2p sub-compartment, we  
324 speculated that A594- $\alpha$ -factor might accumulate at the region distinct from the Sec7p  
325 sub-compartment in the *gga1* $\Delta$  *gga2* $\Delta$  mutant. Thus, we examined the temporal changes  
326 in A594- $\alpha$ -factor localization in the *gga1* $\Delta$  *gga2* $\Delta$  mutant by comparing the localization  
327 with GFP-Tlg2p. In contrast to wild-type cells, in the *gga1* $\Delta$  *gga2* $\Delta$  mutant, the overlap  
328 between A594- $\alpha$ -factor and GFP-Tlg2p increased over time (Fig. 4, D and E). We  
329 further classified the distance between the two peaks into those  $< 65$  nm (1 pixel) and  
330 those from 65-130 nm (1-2 pixels), and found that more than half of the  $\alpha$ -factor  
331 accumulated at sites neighboring the GFP-Tlg2p peak (1-2 pixel) ( $33.5 \pm 11.8\%$ ,  
332  $34.5 \pm 9.0\%$ ,  $57.0 \pm 15.3\%$ , and  $51.1 \pm 10.2\%$  at 5, 10, 20, and 40 min, respectively) (Fig.  
333 4E). To examine  $\alpha$ -factor localization with higher spatial resolution, we observed the  
334 localization of pHrode- $\alpha$ -factor and GFP-Tlg2p at the Golgi/TGN by dual-color 3D

335 SCLIM. Similar to images observed by 2D epi-fluorescence microscopy, we found that  
336  $\alpha$ -factor accumulates at the Tlg2p-residing region and its adjacent region (Fig. 4, F-H).  
337 Furthermore, triple-color 3D imaging demonstrated that pHrode- $\alpha$ -factor signal mostly  
338 co-localized with GFP-Tlg2 rather than Sec7-iRFP (Fig. 4, I and J; Video 7). These  
339 results suggest that in the *gga1* $\Delta$  *gga2* $\Delta$  mutant  $\alpha$ -factor accumulates in or around Tlg2p  
340 sub-compartments due to the defective transport out of the compartment.

341

#### 342 **GGA adaptors are required for turnover of the Tlg2p sub-compartment**

343 GGA adaptors have been believed to function at the Sec7p-residing TGN  
344 compartment (Daboussi et al., 2012; Dell'Angelica et al., 2000) but our finding that  
345  $\alpha$ -factor accumulates at the Tlg2p sub-compartment in the *gga1* $\Delta$  *gga2* $\Delta$  mutant  
346 suggests that GGA may be required for the transport from the Tlg2p sub-compartment  
347 instead of the Sec7p sub-compartment. Thus, we next investigated the effects of  
348 deleting *GGA1* and *GGA2* on the Tlg2p or Sec7p sub-compartment. Simultaneous  
349 dual-color 2D imaging revealed that in the *gga1* $\Delta$  *gga2* $\Delta$  mutant the Tlg2p and Sec7p  
350 sub-compartments were more segregated and that the overlap of GFP-Tlg2p with  
351 Sec7-mCherry was markedly decreased ( $46.3 \pm 2.6\%$ ), relative to wild-type cells  
352 ( $76.9 \pm 7.7\%$ ) (Fig. 5, A and B). The double-color 4D SCLIM observation demonstrated  
353 that Sec7-mCherry signals appeared in the vicinity of the pre-existing Tlg2p  
354 sub-compartment and then Tlg2p disappeared gradually consistent with the previous  
355 report in wild-type cells (Fig. 5, C and D; Video 8) (Tojima et al., 2019). In contrast, in  
356 the *gga1* $\Delta$  *gga2* $\Delta$  mutant, the Sec7p sub-compartment turned over, whereas the turnover

357 of the Tlg2p sub-compartment was significantly delayed, resulting in an increase of the  
358 sub-compartments displaying only GFP-Tlg2p (Fig. 5, E-G; Video 9). Line scan  
359 analyses revealed that Tlg2p and Sec7p sub-compartments were clearly segregated in  
360 the *gga1Δ gga2Δ* mutant (Fig. 5, H and I; Video 10). We also examined the localization  
361 of Tlg1p and found that it shows similar dynamics to Tlg2p in both wild-type and the  
362 *gga1Δ gga2Δ* cells (Fig. S2, A-D). These results suggest that the Tlg2p and Sec7p  
363 sub-compartments are discrete entities in the mutant.

364         Since GGA adaptors are required for the turnover of the Tlg2p  
365 sub-compartment, we speculate that the adaptors play a role there. Our simultaneous  
366 dual-color 2D imaging showed that ~64.6% of Gga2p signals overlapped with the Tlg2p  
367 sub-compartment (Fig. S3A). To examine the spatiotemporal localization of Gga2p  
368 precisely, we performed triple-color imaging of GFP-Tlg2p, Sec7-iRFP, and  
369 Gga2-mCherry by SCLIM. As reported previously, we observed that Gga2p appears  
370 around the Sec7p sub-compartment and disappears at a similar time as Sec7p (Fig. 5,  
371 J-K; Video 11) (Daboussi et al., 2012; Tojima et al., 2019). As expected, a comparison  
372 of the spatiotemporal localization of Gga2p, Tlg2p, and Sec7p in the Golgi/TGN  
373 revealed that Gga2-mCherry signals co-localize with GFP-Tlg2p-residing  
374 sub-compartments (Fig. 5K; Video 11). We also found that the Gga2-mCherry signal  
375 remained after the GFP-Tlg2p signal disappeared, but the Gga2-mCherry-labeled region  
376 seemed to be distinct from Sec7-iRFP-labeled sub-compartment (Fig. 5L; Video 11).  
377 Thus, Gga2p likely appears at the Tlg2p sub-compartment during the decay phase of  
378 Tlg2p, and mediates the transport of  $\alpha$ -factor and presumably Tlg2p itself from the

379 Tlg2p sub-compartment to the Vps21p-residing endosomal compartment.

380

### 381 **Endocytosed Snc1p is recycled back to the PM via the Tlg2p sub-compartment**

382 Previous studies have shown that Snc1p, a putative endocytic R-SNARE,  
383 transiently localizes to the Sec7p sub-compartment after being endocytosed, and returns  
384 to the cell surface through the secretory pathway (Best et al., 2020; Robinson et al.,  
385 2006). We have demonstrated in the present study that the Tlg2p sub-compartment is  
386 the first destination for endocytic traffic, and that endocytic cargo is transported to the  
387 Vps21p-residing compartment without passing through the Sec7p sub-compartment.  
388 Thus, we next wished to determine whether the pathway back to the PM is also  
389 mediated through the Tlg2p sub-compartments. We first confirmed that GFP-Snc1p and  
390 A594- $\alpha$ -factor are loaded into the same endocytic vesicle. Using total internal reflection  
391 fluorescence microscopy (TIRFM), we observed that A594- $\alpha$ -factor and GFP-Snc1p  
392 were localized in the same vesicles and moved together in the vicinity of the PM surface  
393 in wild-type cells (Fig. 6A). As reported previously (Black and Pelham, 2000), in the  
394 *gga1 $\Delta$  gga2 $\Delta$*  mutant, GFP-Snc1p accumulated at intracellular structures (Fig. S3B),  
395 suggesting that the transport of GFP-Snc1p to the PM, as well as that of endocytic cargo  
396 to the vacuole, is impaired. We found that the intracellular localization of GFP-Snc1p  
397 overlapped well with the Tlg2p sub-compartment in both wild-type ( $73.2 \pm 12.4\%$ ) and  
398 *gga1 $\Delta$  gga2 $\Delta$*  mutant cells ( $78.0 \pm 11.4\%$ ) (Fig. S3C), suggesting that GFP-Snc1p is  
399 sorted to the PM through the Tlg2p sub-compartment.

400 We then wished to determine which sub-compartment, the Tlg2p-residing or

401 the Sec7p-residing, mediates Snc1p transport from the TGN to the PM. Simultaneous  
402 triple-color observation by SCLIM showed that mCherry-Snc1p mostly localized to the  
403 sub-compartment in which GFP-Tlg2p was present (Fig. 6B). Line scan analyses  
404 showed that peaks of mCherry-Snc1p and GFP-Tlg2p signal are almost coincident, but  
405 that the peak of Sec7-iRFP signal is slightly apart from them (Fig. 6C). Interestingly,  
406 4D SCLIM imaging demonstrated that the mCherry-Snc1p signal remained in the  
407 compartment from which GFP-Tlg2p departed and then disappeared at the same time as  
408 or slightly earlier than Sec7-iRFP (Fig. 6D). This observation suggests that Tlg2p and  
409 Snc1p are both sorted to this compartment, but then transported by distinct trafficking  
410 pathways with different timings. The compartment in which Snc1p remains after Tlg2p  
411 leaves appeared to be distinct from the Sec7p sub-compartment (Fig. 6E). We next  
412 confirmed the localization of Snc1p using the *gga1Δ gga2Δ* mutant, because in the  
413 *gga1Δ gga2Δ* mutant the Tlg2p and Sec7p sub-compartments were more clearly  
414 segregated (Fig. 5, E-I). As expected, mCherry-Snc1p signals did not co-localize with  
415 Sec7-mCherry but clearly co-localized with GFP-Tlg2p signals (Fig. 6, F and G; Video  
416 12). Time-lapse imaging showed that mCherry-Snc1p signals were also persistent with  
417 GFP-Tlg2 signals after the disappearance of Sec7-iRFP (Fig. 6H). To further confirm  
418 that the Tlg2p sub-compartment is an early/sorting compartment, we utilized mutant  
419 lacking the *RCY1* gene, because Rcy1p, a F-box protein, has been shown to be required  
420 for the transport of Snc1p to the PM (Galan et al., 2001; Ma and Burd, 2020;  
421 Wiederkehr et al., 2000). Previous studies have demonstrated that in the *rcy1Δ* mutant  
422 Snc1p partially co-localizes with Tlg1p but does not co-localize with Sec7p (Best et al.,



423 2020; Ma and Burd, 2019). Similar to the case of Tlg1p, 3D SCLIM imaging  
424 demonstrated that mCherry-Snc1p signals overlap mainly with the Tlg2p  
425 sub-compartment adjacent to the Sec7p sub-compartment in the mutant (Fig. 6I; Video  
426 13). These results clearly indicate that endocytosed Snc1p is sorted to the PM via the  
427 Tlg2p sub-compartment, and taken together with the results obtained from assays using  
428 fluorescently labeled  $\alpha$ -factor, suggest that the Tlg2p-residing region serves as the  
429 endocytic early/sorting compartment.  
430

## 431 **Discussion**

### 432 **The Tlg2p sub-compartment functions as an endocytic early/sorting compartment**

433           On the basis of the data presented here and in previous studies, we propose a  
434 role for the Tlg2p sub-compartment as an early/sorting compartment in the endocytic  
435 pathway (Fig. 7). In contrast to the previous observation (Day et al., 2018), we have  
436 shown here that endocytic cargo is incorporated into a Tlg2p sub-compartment distinct  
437 from the Sec7p-residing one at the TGN. Then, the endocytic cargo  $\alpha$ -factor is  
438 transported to the Vps21p-residing compartment dependent on GGA adaptors although  
439 whether they directly bind to the cargo is unclear, while Snc1p is transported to the PM.  
440 A recent study demonstrated that in plants the TGN has at least two subregions (zones)  
441 responsible for secretory and vacuolar trafficking (Nakano, 2022; Shimizu et al., 2021),  
442 and endocytic cargo transport via the Tlg2p sub-compartment might mediate this later  
443 zone. We recently reported that Vps9p, a GEF for Vps21p, is recruited to the TGN, and  
444 then transported to the endosome to activate Vps21p through Ent3p/5p-mediated vesicle  
445 transport (Nagano et al., 2019). Previous studies reported that GGA adaptors-enriched  
446 vesicles include Ent3p and Ent5p (Daboussi et al., 2012), and thus Vps9p might be  
447 recruited to and transported from the Tlg2p sub-compartment. In *ent3 $\Delta$  ent5 $\Delta$*  cells as  
448 well as *vps21 $\Delta$  ypt52 $\Delta$*  cells, Vps21p-mediated endosomal transport is impaired  
449 (Nagano et al., 2019), and thus  $\alpha$ -factor and Tlg2p presumably accumulate at the  
450 Vps21p-residing compartment. In contrast, deletion of Gga1p/2p has a negligible effect  
451 on Vps21p-mediated endosome formation (Nagano et al., 2019), but affects turnover of  
452 the Tlg2p sub-compartment (Fig. 7).

453

#### 454 **Integrating the present model with earlier observations**

455           The yeast Q-SNAREs Tlg1p and Tlg2p were first identified a few decades  
456 ago, and their roles have been debated because of their localization at the TGN and  
457 endosomal compartment (Abeliovich et al., 1998; Holthuis et al., 1998b; Seron et al.,  
458 1998). Previous studies using electron microscopy showed that endocytic cargo is first  
459 transported to the tubular/vesicular structure that contains Tlg1p after internalization  
460 (Prescianotto-Baschong and Riezman, 1998). A recent study by Day et al reported that  
461 both Tlg1p and Tlg2p shows substantial colocalization with Sec7p (~50%  
462 GFP-Tlg1p-labeled puncta overlap with Sec7p-residing TGN), but rarely overlap with  
463 Vps8-residing PVC (Day et al., 2018). Holthuis et al. reported that upon subcellular  
464 fractionation the two proteins peaked at different densities, leading the authors to  
465 propose that the two proteins are found in a putative early endosome, and the  
466 Golgi/PVC respectively (Holthuis et al., 1998b). However, their distribution within the  
467 fractions entirely overlapped and Tlg2p is also found in the peak fraction of Tlg1p  
468 (Holthuis et al., 1998b). Matching these observations, we observed that both Tlg1p and  
469 Tlg2p substantially localize at the TGN while Tlg1p localizes at the PVC less than  
470 Tlg2p. Thus, Tlg1p seems to localize at the Tlg2p sub-compartment and function  
471 together with it.

472           By examining the localization, we demonstrated that Alexa- $\alpha$ -factor,  
473 transported to the Tlg2p sub-compartment adjacent to the Sec7p sub-compartment,  
474 moves to the Vps21p-residing compartment presumably together with Tlg2p. As Tlg2p

475 interacts with Snc2p, a potential endocytic R-SNARE, and its deletion caused a defect  
476 in the endocytic pathway (Abeliovich et al., 1998; Paumet et al., 2001; Seron et al.,  
477 1998), the primary role of Tlg2p in the endocytic pathway seems to be in mediating  
478 fusion of the endocytic vesicle with the early/sorting compartment. Additionally, Tlg2p  
479 present in the Vps21p-residing compartment might have a role in endosomal fusion.  
480 After being transported to the Vps21p-residing compartment, Tlg2p may be returned to  
481 the early/sorting compartment by interacting with Ypt6p (yeast Rab6) and the  
482 Golgi-associated retrograde protein (GARP) complex (Siniosoglou and Pelham, 2001;  
483 Suda et al., 2013).

484 Tojima et al. have previously demonstrated that Tlg2p and Sec7p overlap  
485 during Golgi/TGN maturation (Tojima et al., 2019), and Day et al. have reported that  
486 FM4-64 and  $\alpha$ -factor is transported to the Sec7p sub-compartment immediately after  
487 endocytic internalization (Day et al., 2018). Our present analysis indicates that Tlg2p  
488 partially overlaps with Sec7p, although the major part of the Tlg2p sub-compartment  
489 exists separate from the Sec7p-residing one. The clathrin-residing region has also been  
490 shown to segregate from the Tlg2p sub-compartment, although it largely overlaps with  
491 the Sec7p sub-compartment (Tojima et al., 2019), supporting the idea that the Tlg2p and  
492 Sec7p sub-compartments are segregated spatially. Our model, therefore, is not  
493 inconsistent with those built on previous observations, but adds the concept that the  
494 Tlg2p-residing region, rather than the Sec7p-residing region, functions as an endocytic  
495 early/sorting compartment.

496

497 **Possible mechanism for early/sorting compartment generation**

498           How the endocytic early/sorting compartment is generated and turned over  
499 has been unclear both in plants and mammals. Our findings provide a new insight into  
500 the mechanism. Recent studies have demonstrated that the appearance and the dynamic  
501 behaviors of Golgi/TGN-resident proteins exhibit a unique order of events during  
502 Golgi/TGN maturation (Kim et al., 2016; Kurokawa et al., 2019; Thomas et al., 2021;  
503 Tojima et al., 2019). Tojima et al. proposed that the Golgi/TGN maturation process can  
504 be classified into three successive stages: the Golgi stage, the early TGN stage, and the  
505 late TGN stage; Tlg2p was categorized as an early TGN-resident protein (Tojima et al.,  
506 2019). Our present results indicate that, after capturing endocytic vesicles, the Tlg2p  
507 sub-compartment gradually disappears through export of Tlg2p to the Vps21p-residing  
508 compartment. The Tlg2p sub-compartment is presumably regenerated by  
509 Sys1p-mediated retrograde transport. Sys1p, a late Golgi-resident protein, recruits  
510 GARP complexes through the Sys1-Arl3-Arl1-Imh1 cascade (Graham, 2004), and  
511 interacts with vesicles containing Tlg1p derived from endosomes (Chen et al., 2019;  
512 Siniosoglou and Pelham, 2001). Tlg1p is known to bind directly to the GARP complex  
513 and mediates the retrograde transport from the late endosome (Siniosoglou and Pelham,  
514 2001). Tlg2p has been also reported to be cycled between the TGN and endosome  
515 (Lewis et al., 2000). Interestingly, a previous study reported that the majority of the  
516 Sys1p-residing compartment is not accompanied by clathrin appearance (Tojima et al.,  
517 2019), suggesting that Sys1p resides in a distinct compartment from the Sec7p-residing  
518 one. The observation that the Sys1p-residing compartment appears before Tlg2p and

519 matures into the Tlg2p-residing one (Tojima et al., 2019) supports the idea that Sys1p  
520 may play a role in generating the early/sorting compartment.

521

## 522 **Role of GGA adaptors in endocytic cargo transport**

523           A previous study has suggested the importance of GGA adaptors in the export  
524 of  $\alpha$ -factor from the Sec7p sub-compartment (Day et al., 2018). Black and Pelham  
525 reported that Pep12p, a yeast syntaxin localized primarily at the late endosome, is also  
526 mislocalized to the Tlg1p high-density membranes in *gga1 $\Delta$  gga2 $\Delta$*  cell, and suggested  
527 that an aberrant early endosome structure may cause a defect in the TGN-to-endosome  
528 traffic (Black and Pelham, 2000). Here we have shown that in *gga1 $\Delta$  gga2 $\Delta$*  cells  
529  $\alpha$ -factor accumulates at the Tlg2p sub-compartment. Interestingly, in *gga1 $\Delta$  gga2 $\Delta$*   
530 cells, turnover of the Tlg2p- and Tlg1p-residing sub-compartment is impaired, and these  
531 observations suggest that export of cargos by GGA adaptors is important for normal  
532 turnover of the Tlg2p sub-compartment. As GGA adaptors are reported to bind directly  
533 to ubiquitin, which function as a sorting signal for lysosomal degradation (Scott et al.,  
534 2004), the ubiquitination signal could mediate the export of  $\alpha$ -factor from the Tlg2p  
535 sub-compartment. Several cell-surface proteins, including the  $\alpha$ -factor receptor Ste3p,  
536 are known to be ubiquitinated, thereby being sorted from the TGN to the vacuole  
537 (Buelto et al., 2020; Scott et al., 2004). The  $\alpha$ -factor receptor Ste2p is also ubiquitinated  
538 upon ligand binding, promoting incorporation of the  $\alpha$ -factor-Ste2p complex into the  
539 clathrin-coated vesicle (Hicke and Riezman, 1996; Toshima et al., 2009). Thus, after  
540 being transported to the Tlg2p sub-compartment, the ubiquitinated  $\alpha$ -factor-Ste2p

541 complex could be exported to the Vps21p-residing compartment by binding to GGA  
542 adaptors.

543           Two major clathrin adaptors, GGA adaptors and the AP-1 complex, were  
544 implicated to act in TGN-endosome trafficking (Traub, 2005). Daboussi et al. showed  
545 that the major population of Gga2p and AP-1 is separated both temporally and spatially,  
546 and that Gga2p arrives earlier than AP-1 at almost the same time point as Sec7p  
547 (Daboussi et al., 2012). In contrast, Gga1p appears to arrive at the TGN earlier than  
548 Gga2p, presumably with similar timing to Tlg2p because it arrives 3 sec earlier than  
549 Chs5p, a component of the exomer complex (Anton-Plagaro et al., 2021). A recent  
550 study has reported that GGA adaptors, but not the AP-1 complex, are necessary for the  
551 transport of newly synthesized vacuolar protein from the TGN to the vacuole via the  
552 VPS pathway (Casler and Glick, 2020). We previously demonstrated that convergence  
553 of the endocytic and VPS pathways occurs upstream of the requirement for Vps21p in  
554 the early stage of the endocytic pathway (Toshima et al., 2014). Taken together, these  
555 observations suggest that the endocytic cargo derived from the PM and the biosynthetic  
556 cargo for the VPS pathway both reach the Tlg2p sub-compartment and exit there by a  
557 GGA-adaptor-dependent mechanism.

## 558 **Materials and Methods**

### 559 **Yeast strains, growth conditions, and plasmids**

560 The yeast strains used in this study are listed in Table S1. All strains were grown at  
561 25°C in standard rich medium (YPD) or synthetic medium (SM) supplemented with 2%  
562 glucose and appropriate amino acids. The N-terminal GFP-tagged Tlg2p was expressed  
563 as follows: the SacI and HindIII fragment (containing iGFP-TLG2) extracted from  
564 YLplac211-iGFP-TLG2 plasmid (Addgene #105262) was inserted into the SacI and  
565 EcoRV-digested pRS303 (pRS303-iGFP-Tlg2). To integrate pRS303-iGFP-TLG2 into  
566 the HIS3 locus, the plasmid was linearized by NheI and transformed into wild-type or  
567 mutant cells. The N-terminal GFP tagging of Vps21p and the C-terminal fluorescent  
568 protein tagging of proteins was performed as described previously (Toshima et al.,  
569 2014).

570

### 571 **Fluorescence labeling of $\alpha$ -factor and endocytosis assays**

572 Fluorescence labeling of  $\alpha$ -factor was performed as described previously<sup>23</sup>. For  
573 endocytosis assays, cells were grown to an OD<sub>600</sub> of ~0.5 in 0.5 ml YPD, briefly  
574 centrifuged, and resuspended in 20  $\mu$ l SM with 5  $\mu$ M Alexa Fluor-labeled  $\alpha$ -factor.  
575 After incubation on ice for 2 h, the cells were washed with ice-cold SM. Internalization  
576 was initiated by addition of SM containing 4% glucose and amino acids at 25°C.

577

### 578 **Fluorescence microscopy and image analysis**



579 2D imaging was performed using an Olympus IX83 microscope equipped with a  
580 x100/NA 1.40 (Olympus) or a x100/NA 1.49 (Olympus) objective and Orca-AG cooled  
581 CCD camera (Hamamatsu), using Metamorph software (Universal Imaging). For TIRF  
582 illumination, optically pumped semiconductor laser (OPSL) (Coherent) with emission  
583 of at 488 nm (OBIS 488LS-50) and at 561 nm (OBIS 561LS-50) were used to excite  
584 GFP or mCherry/Alexa594, respectively. Simultaneous imaging of red and green  
585 fluorescence was performed using an Olympus IX83 microscope, described above, and  
586 an image splitter (Dual-View; Optical Insights) that divided the red and green  
587 components of the images with a 565-nm dichroic mirror and passed the red component  
588 through a 630/50 nm filter and the green component through a 530/30 nm filter. These  
589 split signals were taken simultaneously with one CCD camera, described above. 2D  
590 triple-color imaging were performed using an Olympus IX81 microscope equipped with  
591 a high-speed filter changer (Lambda 10-3; Sutter Instruments) that can change filter sets  
592 within 40 ms. All cells were imaged during the early- to mid-logarithmic phase. Images  
593 for analysis of co-localization of red and green signals were acquired using  
594 simultaneous imaging (64.5 nm pixel size), described above. Intensity profiles of  
595 GFP-fused protein and mCherry-fused protein or A594- $\alpha$ -factor were generated using  
596 the Plot Profile tool (ImageJ v1.53a) across the center of fluorescence signals. All the  
597 data which shows two peaks of GFP and mCherry/Alexa Fluor intensity with a distance  
598 of less than 2 pixels, are defined as "overlapping".

599 3D and 4D imaging were performed with SCLIM (Kurokawa and Nakano,  
600 2020; Tojima et al., 2022). The system is composed of an Olympus IX73 microscope,

601 solid-state lasers with emission at 473 nm (Blues™, 50 mW; Cobolt), 561 nm (Jive™,  
602 50 mW; Cobolt) and 671 nm (CL671-100-S, 100 mW; CrystaLaser), a UPlanXApo  
603 x100/NA 1.45 (Olympus) objective, a high-speed spinning-disk confocal scanner  
604 (Yokogawa Electric), a custom-built piezo actuator (Yokogawa Electric), a custom-built  
605 emission splitter unit, image intensifiers (Hamamatsu) with a custom-made cooling  
606 system, a magnification lens system to provide x266.7 final magnification, and three  
607 EM-CCD cameras (Hamamatsu) for green, red, and infrared fluorescence channels. The  
608 pixel size corresponds to 0.06  $\mu\text{m}$  on the sample plane. For 3D observations, we  
609 collected 21 optical sections spaced 0.2  $\mu\text{m}$  apart (z-range = 4.0  $\mu\text{m}$ ). Z-stack images  
610 were reconstructed to 3D images and deconvoluted by using theoretical point spread  
611 functions with Volocity (Quorum Technologies).

612

613

614 **Acknowledgements**

615 This work was supported by JSPS KAKENHI GRANT #18K062291, and the Takeda  
616 Science Foundation to J.Y.T., as well as JSPS KAKENHI GRANT #19K065710, the  
617 Takeda Science Foundation, and Life Science Foundation of JAPAN to J.T.

618

619

620 **Author contributions**

621 J.Y. Toshima designed and performed most experiments, analyzed data, and wrote the  
622 manuscript. A. Tsukahara performed the initial experiments and analysis. M. Nagano  
623 and T. Tojima performed the part of experiments and provided critical input. D.E.  
624 Siekhaus and A. Nakano reviewed and edited the manuscript, and provided critical  
625 input. J. Toshima designed and supervised the study and wrote and edited the  
626 manuscript.

627

628 **Declaration of interest**

629 The authors declare no competing interests.

630

631 **References**

632

633 Abeliovich, H., E. Grote, P. Novick, and S. Ferro-Novick. 1998. Tlg2p, a yeast syntaxin  
634 homolog that resides on the Golgi and endocytic structures. *Journal of*  
635 *Biological Chemistry*. 273:11719-11727.

636 Anton-Plagaro, C., N. Sanchez, R. Valle, J.M. Mulet, M.C. Duncan, and C. Roncero.  
637 2021. Exomer complex regulates protein traffic at the TGN through differential  
638 interactions with cargos and clathrin adaptor complexes. *FASEB journal :*  
639 *official publication of the Federation of American Societies for Experimental*  
640 *Biology*. 35:e21615.

641 Best, J.T., P. Xu, J.G. McGuire, S.N. Leahy, and T.R. Graham. 2020. Yeast  
642 synaptobrevin, Snc1, engages distinct routes of postendocytic recycling  
643 mediated by a sorting nexin, Rcy1-COPI, and retromer. *Mol Biol Cell*.  
644 31:944-962.

645 Black, M.W., and H.R. Pelham. 2000. A selective transport route from Golgi to late  
646 endosomes that requires the yeast GGA proteins. *J Cell Biol*. 151:587-600.

647 Buelto, D., C.W. Hung, Q.L. Aoh, S. Lahiri, and M.C. Duncan. 2020. Plasma  
648 membrane to vacuole traffic induced by glucose starvation requires  
649 Gga2-dependent sorting at the trans-Golgi network. *Biol Cell*. 112:349-367.

650 Casler, J.C., and B.S. Glick. 2020. A microscopy-based kinetic analysis of yeast  
651 vacuolar protein sorting. *Elife*. 9:e56844.

652 Casler, J.C., N. Johnson, A.H. Krahn, A. Pantazopoulou, K.J. Day, and B.S. Glick. 2021.  
653 Clathrin adaptors mediate two sequential pathways of intra-Golgi recycling.  
654 *Journal of Cell Biology*. 221:e202103199.

655 Chen, Y.T., I.H. Wang, Y.H. Wang, W.Y. Chiu, J.H. Hu, W.H. Chen, and F.J.S. Lee.  
656 2019. Action of Arl1 GTPase and golgin Imh1 in Ypt6-independent retrograde  
657 transport from endosomes to the trans-Golgi network. *Mol Biol Cell*.  
658 30:1008-1019.

659 Cullen, P.J., and F. Steinberg. 2018. To degrade or not to degrade: mechanisms and  
660 significance of endocytic recycling. *Nat Rev Mol Cell Bio*. 19:679-696.

661 Daboussi, L., G. Costaguta, and G.S. Payne. 2012. Phosphoinositide-mediated clathrin  
662 adaptor progression at the trans-Golgi network. *Nat Cell Biol*. 14:239-248.

663 Day, K.J., J.C. Casler, and B.S. Glick. 2018. Budding Yeast Has a Minimal

- 664 Endomembrane System. *Dev Cell*. 44:56-72e54.
- 665 Dell'Angelica, E.C., R. Puertollano, C. Mullins, R.C. Aguilar, J.D. Vargas, L.M.  
666 Hartnell, and J.S. Bonifacino. 2000. GGAs: A family of ADP ribosylation  
667 factor-binding proteins related to adaptors and associated with the Golgi  
668 complex. *Journal of Cell Biology*. 149:81-93.
- 669 Dobzinski, N., S.G. Chuartzman, R. Kama, M. Schuldiner, and J.E. Gerst. 2015.  
670 Starvation-Dependent Regulation of Golgi Quality Control Links the TOR  
671 Signaling and Vacuolar Protein Sorting Pathways. *Cell Rep*. 12:1876-1886.
- 672 Galan, J.M., A. Wiederkehr, J.H. Seol, R. Haguenaer-Tsapis, R.J. Deshaies, H.  
673 Riezman, and M. Peter. 2001. Skp1p and the F-box protein Rcy1p form a  
674 non-SCF complex involved in recycling of the SNARE Snc1p in yeast. *Mol Cell*  
675 *Biol*. 21:3105-3117.
- 676 Gerst, J.E., L. Rodgers, M. Riggs, and M. Wigler. 1992. Snc1, a Yeast Homolog of the  
677 Synaptic Vesicle-Associated Membrane-Protein Synaptobrevin Gene Family -  
678 Genetic Interactions with the Ras and Cap Genes. *Proc Natl Acad Sci U S A*.  
679 89:4338-4342.
- 680 Graham, T.R. 2004. Membrane targeting: Getting Arl to the Golgi. *Current Biology*.  
681 14:R483-R485.
- 682 Grote, E., G. Vlacich, M. Pypaert, and P.J. Novick. 2000. A snc1 endocytosis mutant:  
683 Phenotypic analysis and suppression by overproduction of dihydrosphingosine  
684 phosphate lyase. *Mol Biol Cell*. 11:4051-4065.
- 685 Gurunathan, S., D. Chapman-Shimshoni, S. Trajkovic, and J.E. Gerst. 2000. Yeast  
686 exocytic v-SNAREs confer endocytosis. *Mol Biol Cell*. 11:3629-3643.
- 687 Hicke, L., and H. Riezman. 1996. Ubiquitination of a yeast plasma membrane receptor  
688 signals its ligand-stimulated endocytosis. *Cell*. 84:277-287.
- 689 Holthuis, J.C., B.J. Nichols, and H.R. Pelham. 1998a. The syntaxin Tlg1p mediates  
690 trafficking of chitin synthase III to polarized growth sites in yeast. *Mol Biol Cell*.  
691 9:3383-3397.
- 692 Holthuis, J.C.M., B.J. Nichols, S. Dhruvakumar, and H.R.B. Pelham. 1998b. Two  
693 syntaxin homologues in the TGN/endosomal system of yeast. *Embo Journal*.  
694 17:113-126.
- 695 Kaksonen, M., and A. Roux. 2018. Mechanisms of clathrin-mediated endocytosis. *Nat*  
696 *Rev Mol Cell Bio*. 19:313-326.

- 697 Kim, J.J., Z. Lipatova, U. Majumdar, and N. Segev. 2016. Regulation of Golgi Cisternal  
698 Progression by Ypt/Rab GTPases. *Dev Cell*. 36:440-452.
- 699 Kurokawa, K., and A. Nakano. 2020. Live-cell Imaging by Super-resolution Confocal  
700 Live Imaging Microscopy (SCLIM): Simultaneous Three-color and  
701 Four-dimensional Live Cell Imaging with High Space and Time Resolution.  
702 *Bio-Protocol*. 10:e3732.
- 703 Kurokawa, K., H. Osakada, T. Kojidani, M. Waga, Y. Suda, H. Asakawa, T. Haraguchi,  
704 and A. Nakano. 2019. Visualization of secretory cargo transport within the  
705 Golgi apparatus. *Journal of Cell Biology*. 218:1602-1618.
- 706 Lachmann, J., F.A. Barr, and C. Ungermann. 2012. The Msb3/Gyp3 GAP controls the  
707 activity of the Rab GTPases Vps21 and Ypt7 at endosomes and vacuoles. *Mol*  
708 *Biol Cell*. 23:2516-2526.
- 709 Lewis, M.J., B.J. Nichols, C. Prescianotto-Baschong, H. Riezman, and H.R. Pelham.  
710 2000. Specific retrieval of the exocytic SNARE Snc1p from early yeast  
711 endosomes. *Mol Biol Cell*. 11:23-38.
- 712 Losev, E., C.A. Reinke, J. Jellen, D.E. Strongin, B.J. Bevis, and B.S. Glick. 2006. Golgi  
713 maturation visualized in living yeast. *Nature*. 441:1002-1006.
- 714 Ma, M.X., and C.G. Burd. 2019. Retrograde trafficking and quality control of yeast  
715 synaptobrevin, Snc1, are conferred by its transmembrane domain. *Mol Biol Cell*.  
716 30:1729-1742.
- 717 Ma, M.X., and C.G. Burd. 2020. Retrograde trafficking and plasma membrane recycling  
718 pathways of the budding yeast *Saccharomyces cerevisiae*. *Traffic*. 21:45-59.
- 719 Martin, A.C., X.P. Xu, I. Rouiller, M. Kaksonen, Y. Sun, L. Belmont, N. Volkman, D.  
720 Hanein, M. Welch, and D.G. Drubin. 2005. Effects of Arp2 and Arp3  
721 nucleotide-binding pocket mutations on Arp2/3 complex function. *J Cell Biol*.  
722 168:315-328.
- 723 Matsuura-Tokita, K., M. Takeuchi, A. Ichihara, K. Mikuriya, and A. Nakano. 2006.  
724 Live imaging of yeast Golgi cisternal maturation. *Nature*. 441:1007-1010.
- 725 Mettlen, M., P.H. Chen, S. Srinivasan, G. Danuser, and S.L. Schmid. 2018. Regulation  
726 of Clathrin-Mediated Endocytosis. *Annual Review of Biochemistry, Vol 87*.  
727 87:871-896.
- 728 Nagano, M., J.Y. Toshima, D.E. Siekhaus, and J. Toshima. 2019. Rab5-mediated  
729 endosome formation is regulated at the trans-Golgi network. *Commun Biol*.

- 730 2:419.
- 731 Nakano, A. 2022. The Golgi Apparatus and its Next-Door Neighbors. *Frontiers in Cell*  
732 *and Developmental Biology*. 10:884360.
- 733 Paumet, F., B. Brugger, F. Parlati, J.A. McNew, T.H. Sollner, and J.E. Rothman. 2001.  
734 A t-SNARE of the endocytic pathway must be activated for fusion. *Journal of*  
735 *Cell Biology*. 155:961-968.
- 736 Prescianotto-Baschong, C., and H. Riezman. 1998. Morphology of the yeast endocytic  
737 pathway. *Mol Biol Cell*. 9:173-189.
- 738 Protopopov, V., B. Govindan, P. Novick, and J.E. Gerst. 1993. Homologs of the  
739 Synaptobrevin Vamp Family of Synaptic Vesicle Proteins Function on the Late  
740 Secretory Pathway in *Saccharomyces-Cerevisiae*. *Cell*. 74:855-861.
- 741 Robinson, M., P.P. Poon, C. Schindler, L.E. Murray, R. Kama, G. Gabriely, R.A. Singer,  
742 A. Spang, G.C. Johnston, and J.E. Gerst. 2006. The Gcs1 Arf-GAP mediates  
743 Snc1,2 v-SNARE retrieval to the Golgi in yeast. *Mol Biol Cell*. 17:1845-1858.
- 744 Scott, P.M., P.S. Bilodeau, O. Zhdankina, S.C. Winistorfer, M.J. Hauglund, M.M.  
745 Allaman, W.R. Kearney, A.D. Robertson, A.L. Boman, and R.C. Piper. 2004.  
746 GGA proteins bind ubiquitin to facilitate sorting at the trans-Golgi network. *Nat*  
747 *Cell Biol*. 6:252-259.
- 748 Seron, K., V. Tieaho, C. Prescianotto-Baschong, T. Aust, M.O. Blondel, P. Guillaud, G.  
749 Devilliers, O.W. Rossanese, B.S. Glick, H. Riezman, S. Keranen, and R.  
750 Haguenaer-Tsapis. 1998. A yeast t-SNARE involved in endocytosis. *Mol Biol*  
751 *Cell*. 9:2873-2889.
- 752 Shimizu, Y., J. Takagi, E. Ito, Y. Ito, K. Ebine, Y. Komatsu, Y. Goto, M. Sato, K.  
753 Toyooka, T. Ueda, K. Kurokawa, T. Uemura, and A. Nakano. 2021. Cargo  
754 sorting zones in the trans-Golgi network visualized by super-resolution confocal  
755 live imaging microscopy in plants. *Nat Commun*. 12:1901.
- 756 Siniosoglou, S., and H.R. Pelham. 2001. An effector of Ypt6p binds the SNARE Tlg1p  
757 and mediates selective fusion of vesicles with late Golgi membranes. *Embo J*.  
758 20:5991-5998.
- 759 Suda, Y., K. Kurokawa, R. Hirata, and A. Nakano. 2013. Rab GAP cascade regulates  
760 dynamics of Ypt6 in the Golgi traffic. *Proc Natl Acad Sci U S A*.  
761 110:18976-18981.
- 762 Thomas, L.L., C.M. Highland, and J.C. Fromme. 2021. Arf1 orchestrates Rab GTPase

- 763 conversion at the trans-Golgi network. *Mol Biol Cell*. 32:1104-1120.
- 764 Tojima, T., D. Miyashiro, Y. Kosugi, and A. Nakano. 2022. Super-resolution live  
765 imaging of cargo traffic through the Golgi apparatus in mammalian cells.  
766 *Methods Mol Biol*. in press.
- 767 Tojima, T., Y. Suda, M. Ishii, K. Kurokawa, and A. Nakano. 2019. Spatiotemporal  
768 dissection of the trans-Golgi network in budding yeast. *J Cell Sci*.  
769 132:jcs231159.
- 770 Toret, C.P., L. Lee, M. Sekiya-Kawasaki, and D.G. Drubin. 2008. Multiple pathways  
771 regulate endocytic coat disassembly in *Saccharomyces cerevisiae* for optimal  
772 downstream trafficking. *Traffic*. 9:848-859.
- 773 Toshima, J.Y., J.I. Nakanishi, K. Mizuno, J. Toshima, and D.G. Drubin. 2009.  
774 Requirements for Recruitment of a G Protein-coupled Receptor to  
775 Clathrin-coated Pits in Budding Yeast. *Mol Biol Cell*. 20:5039-5050.
- 776 Toshima, J.Y., S. Nishinoaki, Y. Sato, W. Yamamoto, D. Furukawa, D.E. Siekhaus, A.  
777 Sawaguchi, and J. Toshima. 2014. Bifurcation of the endocytic pathway into  
778 Rab5-dependent and -independent transport to the vacuole. *Nat Commun*.  
779 5:3498.
- 780 Toshima, J.Y., J. Toshima, M. Kaksonen, A.C. Martin, D.S. King, and D.G. Drubin.  
781 2006. Spatial dynamics of receptor-mediated endocytic trafficking in budding  
782 yeast revealed by using fluorescent alpha-factor derivatives. *Proc Natl Acad Sci*  
783 *U S A*. 103:5793-5798.
- 784 Traub, L.M. 2005. Common principles in clathrin-mediated sorting at the Golgi and the  
785 plasma membrane. *Bba-Mol Cell Res*. 1744:415-437.
- 786 Valencia, J.P., K. Goodman, and M.S. Otegui. 2016. Endocytosis and Endosomal  
787 Trafficking in Plants. *Annu Rev Plant Biol*. 67:309-335.
- 788 Wiederkehr, A., S. Avaro, C. Prescianotto-Baschong, R. Haguenaer-Tsapis, and H.  
789 Riezman. 2000. The F-box protein Rcy1p is involved in endocytic membrane  
790 traffic and recycling out of an early endosome in *Saccharomyces cerevisiae*. *J*  
791 *Cell Biol*. 149:397-410.
- 792
- 793



794 **Figure legends**

795 **Figure 1. Localization of endocytosed  $\alpha$ -factor at the Tlg2p-residing compartment**

796 (A) 2D imaging of A594- $\alpha$ -factor and GFP-Tlg2p. Arrowheads indicate examples of  
797 overlapping localization. Representative fluorescence intensity profiles along a line  
798 (direction from 'a' to 'b') are indicated in the lower panels. (B) Quantification of  
799 GFP-Tlg2p, GFP-Tlg1 and Sec7-GFP overlapping with A594- $\alpha$ -factor. Data show the  
800 mean  $\pm$  SEM from  $n \geq 3$  experiments ( $n > 30$  puncta for each experiment). Different  
801 letters indicate significant differences at  $P < 0.05$  between the indicated times (i.e., no  
802 significant difference for a vs. a, significant difference for a vs. b with  $p < 0.05$ ),  
803 one-way ANOVA with Tukey's post-hoc test. Error bars indicate the standard SD from  
804  $n \geq 3$  experiments ( $n \geq 30$  puncta for each experiment). (C) 3D SCLIM imaging of  
805 GFP-Tlg2p and Sec7-mCherry. White dashed lines indicate cell edges. (D) Multi-angle  
806 magnified 3D views of the boxed area and the representative fluorescence intensity  
807 profiles. Line scan as in A shown at right. (E) 3D SCLIM imaging of GFP-Tlg2p,  
808 Sec7-iRFP and pHrode- $\alpha$ -factor; boxed areas shown magnified in (F-H). The images  
809 were acquired simultaneously at 5 min after pHrode- $\alpha$ -factor internalization. (F)  
810 Multi-angle magnified 3D views of the yellow-boxed area in (E). Line scan as in A  
811 shown at right. (G) Time series of region in the white-boxed area in (E). Arrows and  
812 arrowheads denote the appearance and disappearance of each marker. (H)  
813 Higher-magnification views of the red-boxed area in (G). Scale bars, 2.5  $\mu$ m.

814

815 **Figure 2. Dynamic behavior of the Tlg2p-residing compartment, endocytic vesicles,**

816 **and cargos (A, B)** 2D imaging of GFP-Tlg2p and Abp1-mCherry in wild-type (A) and  
817 *arp3-D11A* cells (B). Kymographs along lines in the upper merged image are shown in  
818 the panels below. A time series of the boxed area in (A) and (B) is shown under the  
819 kymograph. Arrowheads highlight the movement of Abp1p towards the Tlg2p  
820 sub-compartment. **(C-F)** 4D SCLIM imaging of GFP-Tlg2p and Abp1-mCherry in  
821 wild-type (C, E) and *arp3-D11A* (D, F). (E, F) Time-series of the areas boxed in (C) and  
822 (D) are shown in multi-angle magnified 3D views. White and yellow arrowheads  
823 indicate the dynamics of different Abp1p patches. **(G)** 4D SCLIM imaging of  
824 GFP-Vps21p and Abp1-mCherry in wild-type cells. Time-series of the boxed areas are  
825 shown in the right panels. White and red arrowheads indicate the dynamics of the  
826 Vps21p-residing endosome and Abp1p patch. **(H)** The percentages of Abp1p patches  
827 that disappeared from the Tlg2p- or Vps21p-residing compartment. Error bars indicate  
828 the SD from  $n \geq 10$  biological replicates ( $n \geq 40$  Abp1p patches for each experiment).  
829  $***P < 0.001$ , unpaired t-test with Welch's correction. **(I)** 4D SCLIM imaging of  
830 wild-type cells expressing GFP-Tlg2p, Sec7-iRFP, and Abp1-mCherry. **(J)** Time-series  
831 of the boxed area in (I) are shown in magnified 3D views. Arrowheads indicate the  
832 incorporation of Abp1p patches to the sub-compartment including GFP-Tlg2p and  
833 Sec7-iRFP signals. Scale bars, 2.5  $\mu\text{m}$ .

834

835 **Figure 3. Alexa- $\alpha$ -factor is transported from the Tlg2p-residing compartment to**  
836 **the Vps21p-residing endosomal compartment (A)** 2D imaging of GFP-Tlg2p or  
837 Sec7-mCherry and mCherry/GFP-Vps21p. **(B)** Quantification of Tlg2p or Sec7p

838 overlapping with Vps21p. Error bars indicate the SD from  $n \geq 3$  experiments ( $n \geq 30$   
839 puncta for each experiment). (C) Time series of the region in the boxed area in (A).  
840 Representative fluorescence intensity profiles along a line in the merged image at 8 sec  
841 are shown to the right. Yellow arrowhead indicates overlapping localization. (D) 4D  
842 SCLIM imaging of GFP-Tlg2p, Sec7-iRFP, and mCherry-Vps21p. Arrowheads indicate  
843 examples of the association of GFP-Tlg2p and mCherry-Vps21p. (E) Magnified views  
844 from the time-series in (F). Arrowheads indicate a Vps21p-residing endosome.  
845 Representative fluorescence intensity profiles along a line in the merged images at 15  
846 sec are shown to the right. (F) Time series of the region in the boxed area in (D). (G)  
847 Further magnified views from the time-series in (F). (H) 2D imaging of A647- $\alpha$ -factor,  
848 GFP-Tlg2p and mCherry-Vps21p. The images were acquired at 5 and 15 min after  
849 A647- $\alpha$ -factor internalization. Higher-magnification views of the boxed areas are  
850 shown in the lower panels. (I) Quantification of A647- $\alpha$ -factor overlapping with  
851 GFP-Tlg2p or mCherry-Vps21p. Data show the mean  $\pm$  SEM from  $n \geq 3$  experiments ( $n$   
852  $> 30$  puncta for each experiment). Comparisons are made between the same colors, with  
853 different letters indicating significant difference ( $P < 0.05$ ) between the indicated times,  
854 one-way ANOVA with Tukey's post-hoc test. (J) 2D imaging of A594- $\alpha$ -factor and  
855 GFP-Tlg2p in *vps21 $\Delta$  ypt52 $\Delta$*  cells. The images were acquired at 5 and 20 min after  
856 A594- $\alpha$ -factor internalization. Higher-magnification views of the boxed area are shown  
857 in the right panels. Arrowheads indicate examples of the overlapping localization of  
858 A594- $\alpha$ -factor and GFP-Tlg2p. (K) Quantification of GFP-Tlg2p overlapping with  
859 A594- $\alpha$ -factor. Error bars indicate the SD from  $n \geq 3$  experiments ( $n > 30$  puncta for

860 each experiment). \* $P < 0.05$ , unpaired t-test with Welch's correction. Scale bars, 2.5  
861  $\mu\text{m}$ .

862

863 **Figure 4. GGA adaptors are required for export of A594- $\alpha$ -factor out of the**

864 **Tlg2p-residing compartment (A)** 2D imaging of A594- $\alpha$ -factor in cells lacking

865 clathrin adaptor proteins. **(B)** 2D imaging of A594- $\alpha$ -factor and Sec7-GFP in cells

866 lacking clathrin adaptor proteins. The images were acquired simultaneously at 20 min

867 after A594- $\alpha$ -factor internalization. Arrowheads indicate examples of overlapping

868 localization. **(C)** Quantification of Sec7-GFP overlapping with A594- $\alpha$ -factor. Error

869 bars indicate the SD from  $n \geq 3$  experiments ( $n > 30$  puncta for each experiment). \*\*\* $P$

870  $< 0.001$ , unpaired t-test with Welch's correction. **(D)** 2D imaging of A594- $\alpha$ -factor and

871 GFP-Tlg2p in *gga1 $\Delta$  gga2 $\Delta$*  cells. Higher-magnification views of the boxed area are

872 shown in the right panels. Representative fluorescence intensity profiles along lines in

873 the merged images are indicated in the right panels. **(E)** Quantification of GFP-Tlg2p

874 overlapping with A594- $\alpha$ -factor in *gga1 $\Delta$  gga2 $\Delta$*  cells. The bars surrounded by red lines

875 indicate the total ratio of the Tlg2p sub-compartment overlapping with  $\alpha$ -factor. Error

876 bars indicate the SD from  $n \geq 3$  experiments ( $n > 30$  puncta for each experiment). **(F)**

877 3D SCLIM imaging of GFP-Tlg2p and pHrode- $\alpha$ -factor in *gga1 $\Delta$  gga2 $\Delta$*  cells. The

878 images were acquired simultaneously at 20 min after pHrode- $\alpha$ -factor internalization.

879 **(G, H)** Multi-angle magnified 3D views of the boxed areas in (F), representing

880 co-localization (G) or adjacent localization (H) of GFP-Tlg2p and pHrode- $\alpha$ -factor. **(I)**

881 3D SCLIM imaging of GFP-Tlg2p, Sec7-iRFP and pHrode- $\alpha$ -factor in *gga1 $\Delta$  gga2 $\Delta$*

882 cells. The images were acquired simultaneously at 10 min after pHrode- $\alpha$ -factor  
883 internalization. **(J)** Multi-angle magnified 3D views of the boxed area in (I). Scale bars,  
884 2.5  $\mu$ m.

885

886 **Figure 5. The transition from the Tlg2p- to the Sec7p-residing compartment**

887 **requires GGA adaptors** **(A)** 2D imaging of GFP-Tlg2p and Sec7-mCherry in

888 *gga1 $\Delta$  gga2 $\Delta$*  cells. Representative intensity profiles of GFP-Tlg2p or Sec7-mCherry

889 along a line in the merged images are indicated in the right lower panel. **(B)**

890 Quantification of GFP-Tlg2p overlapping with Sec7-mCherry in wild-type and

891 *gga1 $\Delta$  gga2 $\Delta$*  cells. Error bars indicate the SD from  $n \geq 3$  experiments ( $n > 30$  puncta

892 for each experiment).  $**P < 0.01$ , unpaired t-test with Welch's correction. **(C, E)** 4D

893 SCLIM imaging of GFP-Tlg2p and Sec7-mCherry in wild-type cells **(C)** and

894 *gga1 $\Delta$  gga2 $\Delta$*  cells **(E)**. The time series of regions in the boxed areas in **(C)** are shown

895 in the lower panels. Arrows and arrowheads denote the appearance and disappearance

896 of each marker. **(D, G)** Time course changes in relative fluorescence intensity of

897 GFP-Tlg2p and Sec7-mCherry in the boxed areas in **(C)** or **(E)**. **(F)** Time series of the

898 region in the boxed area in **(E)**. **(H, I)** Multi-angle magnified 3D views from **(F)**. **(J)** 4D

899 SCLIM imaging of GFP-Tlg2p, Gga2-mCherry and Sec7-iRFP. The time series of

900 regions in the boxed areas in **(J)** are shown in the lower panels. **(K, L)** Multi-angle

901 magnified 3D views of time points from **(J)**. Scale bars, 2.5  $\mu$ m.

902

903 **Figure 6. Snc1p is sorted to the PM via the Tlg2p-residing compartment** **(A)** TIRF

904 imaging of GFP-Snc1p and A594- $\alpha$ -factor in wild-type cells. The images were acquired  
905 simultaneously at 5 min after A594- $\alpha$ -factor internalization. Arrowheads indicate  
906 A594- $\alpha$ -factor puncta including GFP-Snc1p. (B-E) 4D SCLIM imaging of GFP-Tlg2p,  
907 mCherry-Snc1p and Sec7-iRFP in wild-type cells. (C) Multi-angle magnified 3D views  
908 from the 70 sec image in (D). Representative fluorescence intensity profiles along lines  
909 (direction from 'a' to 'b') in the merged images are indicated in the right panels. (D)  
910 Time series of regions in the boxed area in (B). (E) Higher-magnification views of the  
911 indicated time-points. (F-H) 4D SCLIM imaging of GFP-Tlg2p, mCherry-Snc1p and  
912 Sec7-iRFP in *gga1 $\Delta$  gga2 $\Delta$*  cells. (G) Multi-angle magnified 3D views and  
913 representative fluorescence intensity profiles at 55 sec in (H). (H) The time series of  
914 region in the boxed area in (F). (I) 3D SCLIM imaging of GFP-Tlg2p, mCherry-Snc1p,  
915 and Sec7-iRFP in *rcy1 $\Delta$*  cells. Multi-angle magnified 3D views of the boxed area and  
916 representative fluorescence intensity profiles shown in the lower panels. Scale bars, 2.5  
917  $\mu$ m.

918

919 **Figure 7. Model showing the role of the Tlg2p-residing compartment as an**  
920 **early/sorting compartment in the endocytic pathway.** Schematic showing the  
921 Tlg2p-residing area as a discrete early/recycling sub-compartment that sorts endocytic  
922 cargo to the endocytic or recycling pathway. The effects of *gga1 $\Delta$  gga2 $\Delta$*  cells on the  
923 post-TGN trafficking pathway are shown on the right. See details in the text.

924

925

926 **Supplemental materials**

927 **Figure S1. Localization of  $\alpha$ -factor, Sec7p, Tlg1p, and Tlg2p in wild-type cells. (A,**  
928 **B) 2D imaging of A594- $\alpha$ -factor and Sec7-GFP (A) or GFP-Tlg1p (B) in wild type cells.**  
929 The images were acquired at 5, 10, or 20 min after A594- $\alpha$ -factor internalization.  
930 Yellow arrowheads indicate examples of overlapping localization. Red and green  
931 arrowheads indicate example of A594- $\alpha$ -factor or GFP signal, respectively.  
932 Higher-magnification views of the boxed area are shown in the right panels.  
933 Representative fluorescence intensity profiles along a line (direction from ‘a’ to ‘b’) in  
934 the merged images are indicated in the lower panels. (C) 2D imaging of GFP-Tlg1p and  
935 mCherry-Tlg2p in wild type cells shown also in DIC at right. Yellow arrowheads  
936 indicate examples of overlapping localization. Red arrowheads indicate example of  
937 puncta predominantly localizing mCherry-Tlg2p. Higher-magnification views of the  
938 boxed area are shown in the right panels. Representative fluorescence intensity profiles  
939 along a line (direction from ‘a’ to ‘b’) in the merged images are indicated in the lower  
940 panels. (D) 2D imaging of A647- $\alpha$ -factor, GFP-Tlg1p and mCherry-Tlg2p. The images  
941 were acquired at 5 min after A647- $\alpha$ -factor internalization. Yellow and white  
942 arrowheads indicate examples of puncta in which all fluorescent signals overlap. Scale  
943 bars, 2.5  $\mu$ m.

944

945 **Figure S2. Dynamics of Tlg1p and Tlg2p in wild-type and *gga1* $\Delta$  *gga2* $\Delta$  cells. (A,**  
946 **C) 2D imaging of GFP-Tlg1p and mCherry-Tlg2p in a wild-type (A) or *gga1* $\Delta$  *gga2* $\Delta$**   
947 **(C) cell. A time series of the region boxed in (A, C) are shown in the lower panels.**

948 Arrows and arrowheads denote the appearance and disappearance of each marker. **(B,**  
949 **D)** Time course changes in relative fluorescence intensity of GFP-Tlg1p and  
950 mCherry-Tlg2p. Scale bars, 2.5  $\mu\text{m}$ .

951

952 **Figure S3. Localization of Gga2p and Snc1p at the Tlg2p-residing compartment.**

953 **(A)** 2D imaging of GFP-Tlg2p and Gga2-mCherry. Higher-magnification views of the  
954 boxed area are shown in the right panels. Representative fluorescence intensity profiles  
955 along a line (direction from ‘a’ to ‘b’) in the merged images are indicated in the lower  
956 panels. Quantification of Gga2-mCherry overlapping with GFP-Tlg2p in wild-type cells  
957 is shown in the right panels. **(B)** 2D imaging of GFP-Tlg2p and mCherry-Snc1p in  
958 wild-type and *gga1 $\Delta$  gga2 $\Delta$*  cells. Higher-magnification views of the boxed area are  
959 shown in the right panels. Representative fluorescence intensity profiles along a line  
960 (direction from ‘a’ to ‘b’) in the merged images are indicated in the lower panels.  
961 Yellow arrowheads indicate examples of overlapping localization. **(C)** Quantification of  
962 Snc1p overlapping with Tlg2p is shown to the right. Error bars indicate the SD from  $n \geq$   
963 3 experiments ( $n > 30$  puncta for each experiment).

964



965 **Supplementary Movies**

966 **Video 1**

967 Left; Multi-angle 3D reconstructed movie of GFP-Tlg2p (green) and Sec7-mCherry  
968 (red) in wild-type cell. Right; Multi-angle 3D reconstructed movie of GFP-Tlg2p  
969 (green), Sec7-iRFP (red) and pHrodo- $\alpha$ -factor (cyan).

970

971 **Video 2**

972 Triple-color 4D movie of GFP-Tlg2p (green), Sec7-iRFP(red) and pHrodo- $\alpha$ -factor  
973 (cyan) in a wild-type cell. Arrows indicate examples of the sequential appearance and  
974 disappearance of each protein.

975

976 **Video 3**

977 Upper video; 2D time-lapse movie of Abp1-mCherry (red in merge) and GFP-Tlg2p  
978 (green in merge) in wild-type cell. Arrows indicate movement of an  
979 Abp1-mCherry-labeled endocytic vesicle toward the GFP-Tlg2p-labeled  
980 sub-compartment. Lower video; 2D time-lapse movie of Abp1-mCherry (red in merge)  
981 and GFP-Tlg2p (green in merge) in the *arp3-D11A* mutant. Arrows indicate movement  
982 of the GFP-Tlg2p-labeled sub-compartment toward an Abp1-mCherry-labeled  
983 endocytic vesicle.

984

985 **Video 4**

986 Dual-color 4D movie of GFP-Tlg2p (green) and Abp1-mCherry (red) in a wild-type cell.

987 Arrows indicate examples of Abp1-mCherry-labeled vesicles disappearing on the  
988 GFP-Tlg2p-labeled sub-compartment.

989

990 **Video 5**

991 Dual-color 4D movie of GFP-Tlg2p (green) and Abp1-mCherry (red) in the *arp3-D11A*  
992 mutant. Arrows indicate examples of Abp1-mCherry-labeled vesicles disappearing onto  
993 the GFP-Tlg2p-residing sub-compartment.

994

995 **Video 6**

996 Triple-color 4D movie of GFP-Tlg2p (green), mCherry-Vps21p (red) and Sec7-iRFP  
997 (cyan) in a wild-type cell. Arrows indicate examples of association between GFP-Tlg2p  
998 and mCherry-Vps21p.

999

1000 **Video 7**

1001 Multi-angle 3D reconstructed movie of GFP-Tlg2p (green), Sec7-iRFP (red) and  
1002 pHrodo- $\alpha$ -factor (cyan) in the *gga1 $\Delta$  gga2 $\Delta$*  mutant.

1003

1004 **Video 8**

1005 Dual-color 4D movie of GFP-Tlg2p (green) and Sec7-mCherry (red) in wild-type cell.  
1006 Arrows indicate examples of sequential appearance and disappearance of each protein.

1007

1008 **Video 9**

1009 Dual-color 4D movie of GFP-Tlg2p (green) and Sec7-mCherry (red) in the  
1010 *gga1Δ gga2Δ* mutant.

1011

1012 **Video 10**

1013 Multi-angle 3D reconstructed movie of GFP-Tlg2p (green) and Sec7-mCherry (red) in  
1014 the *gga1Δ gga2Δ* mutant.

1015

1016 **Video 11**

1017 Triple-color 4D movie of GFP-Tlg2p (green), Sec7-iRFP (red) and Gga2-mCherry  
1018 (cyan) in a wild-type cell. Arrows indicate examples of the sequential appearance and  
1019 disappearance of each protein.

1020

1021 **Video 12**

1022 Multi-angle 3D reconstructed movie of GFP-Tlg2p (green), Sec7-iRFP (red) and  
1023 mCherry-Snc1p (cyan) in the *gga1Δ gga2Δ* mutant.

1024

1025 **Video 13**

1026 Multi-angle 3D reconstructed movie of GFP-Tlg2p (green), Sec7-iRFP (red) and  
1027 mCherry-Snc1p (cyan) in the *rcy1Δ* mutant.

1028

1029

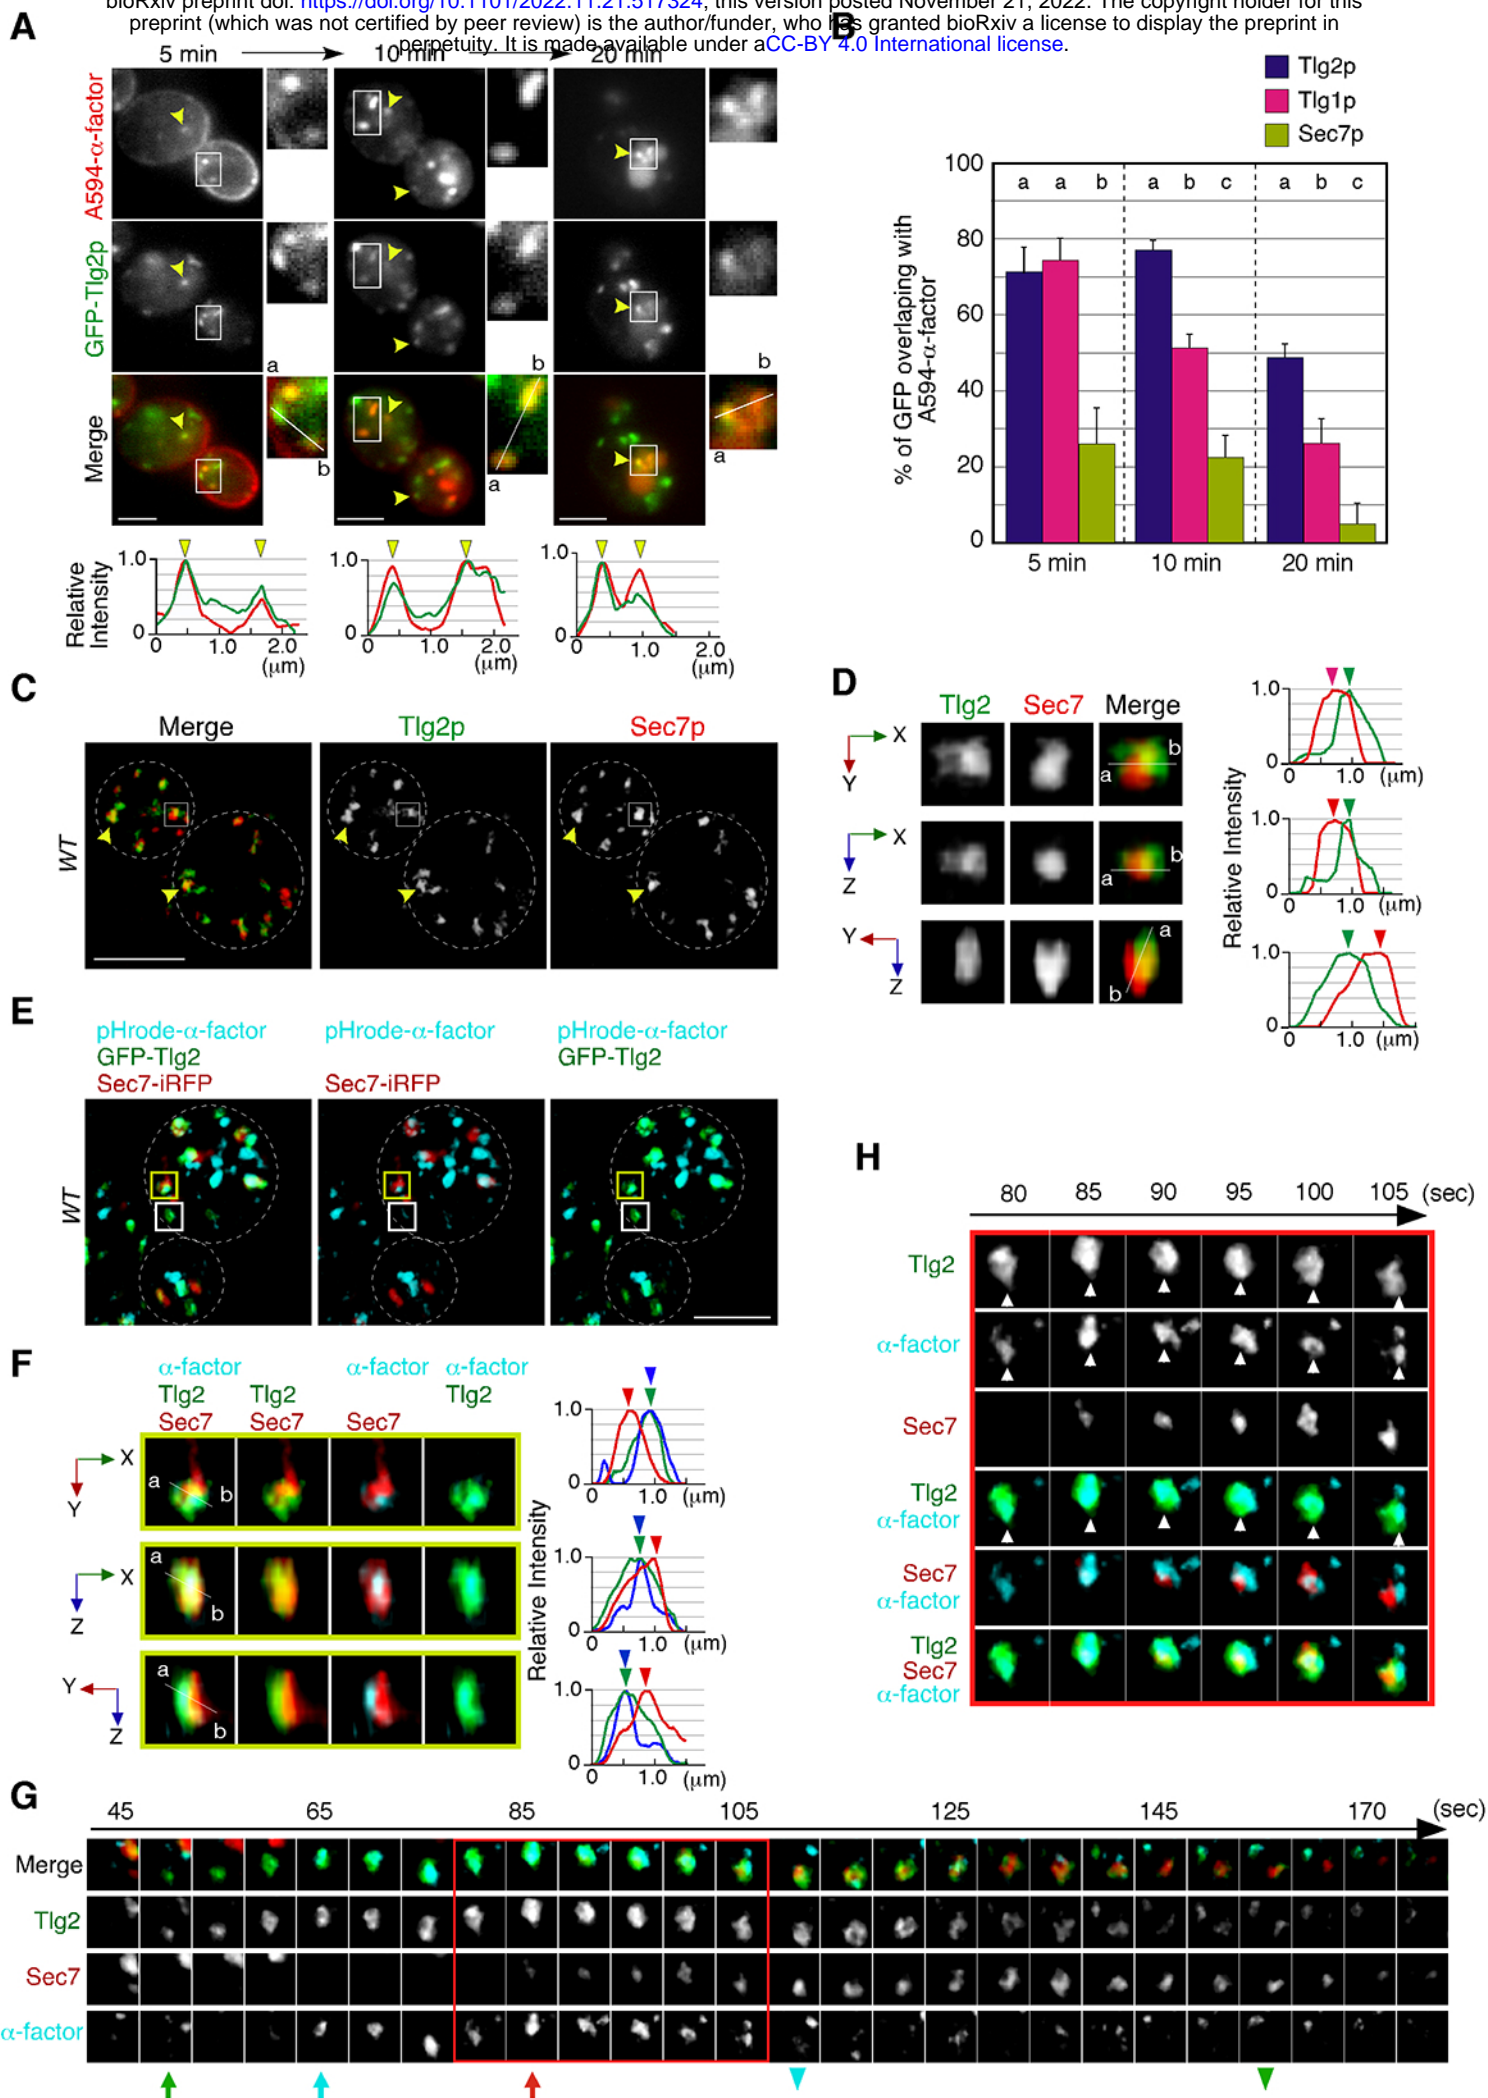

Figure 1. Toshima et al.

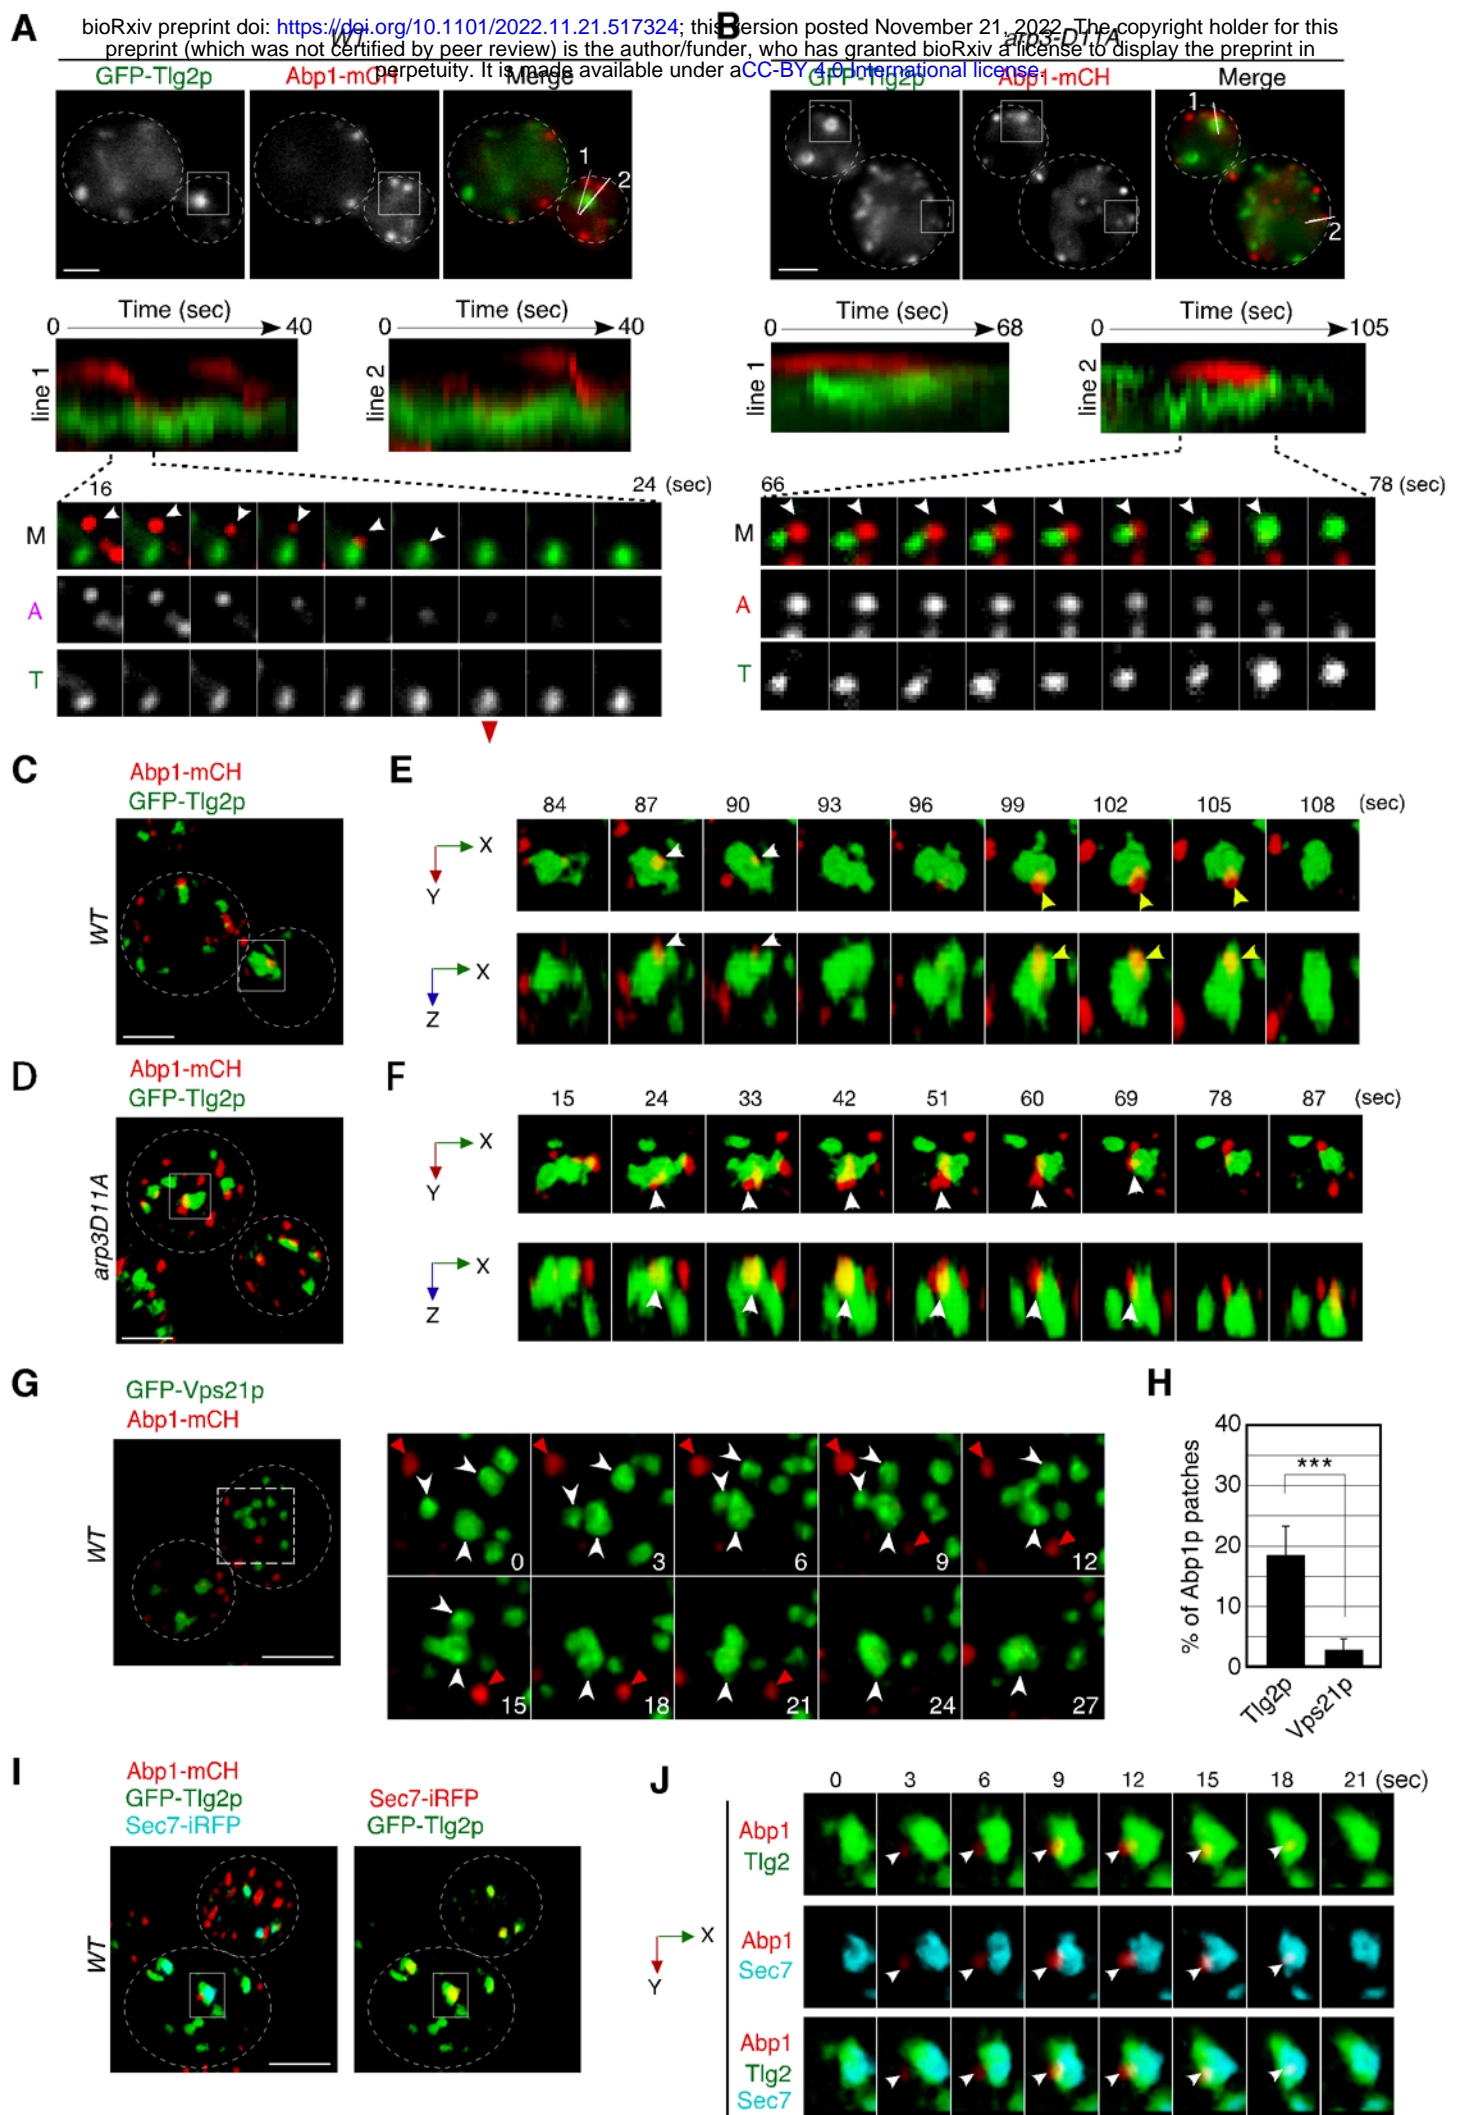

Figure 2. Toshima et al.



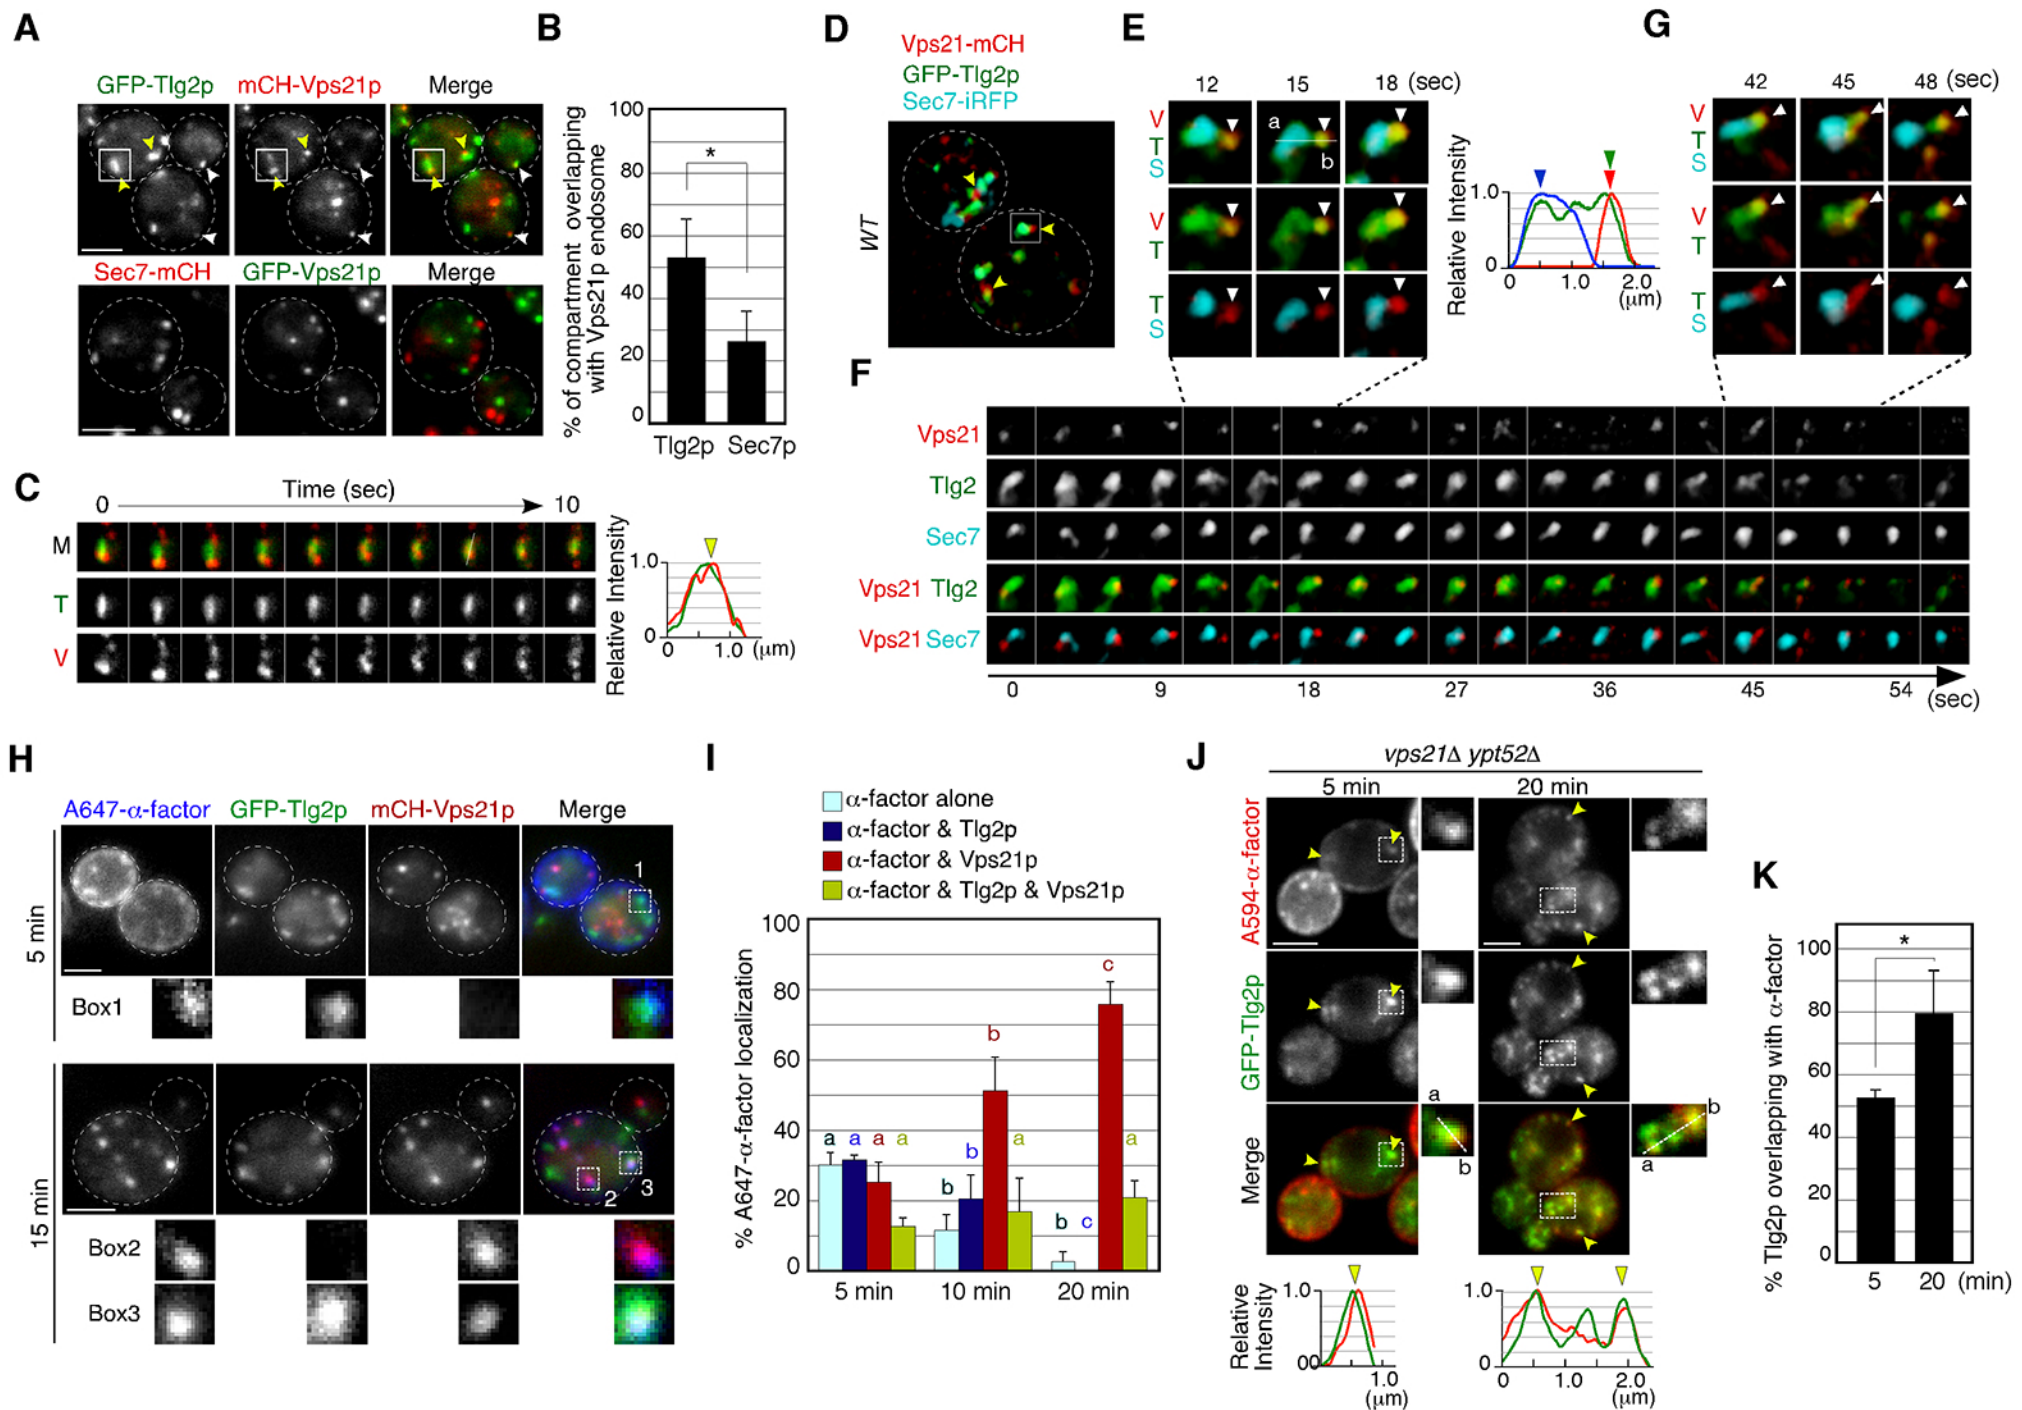

Figure 3. Toshima et al.

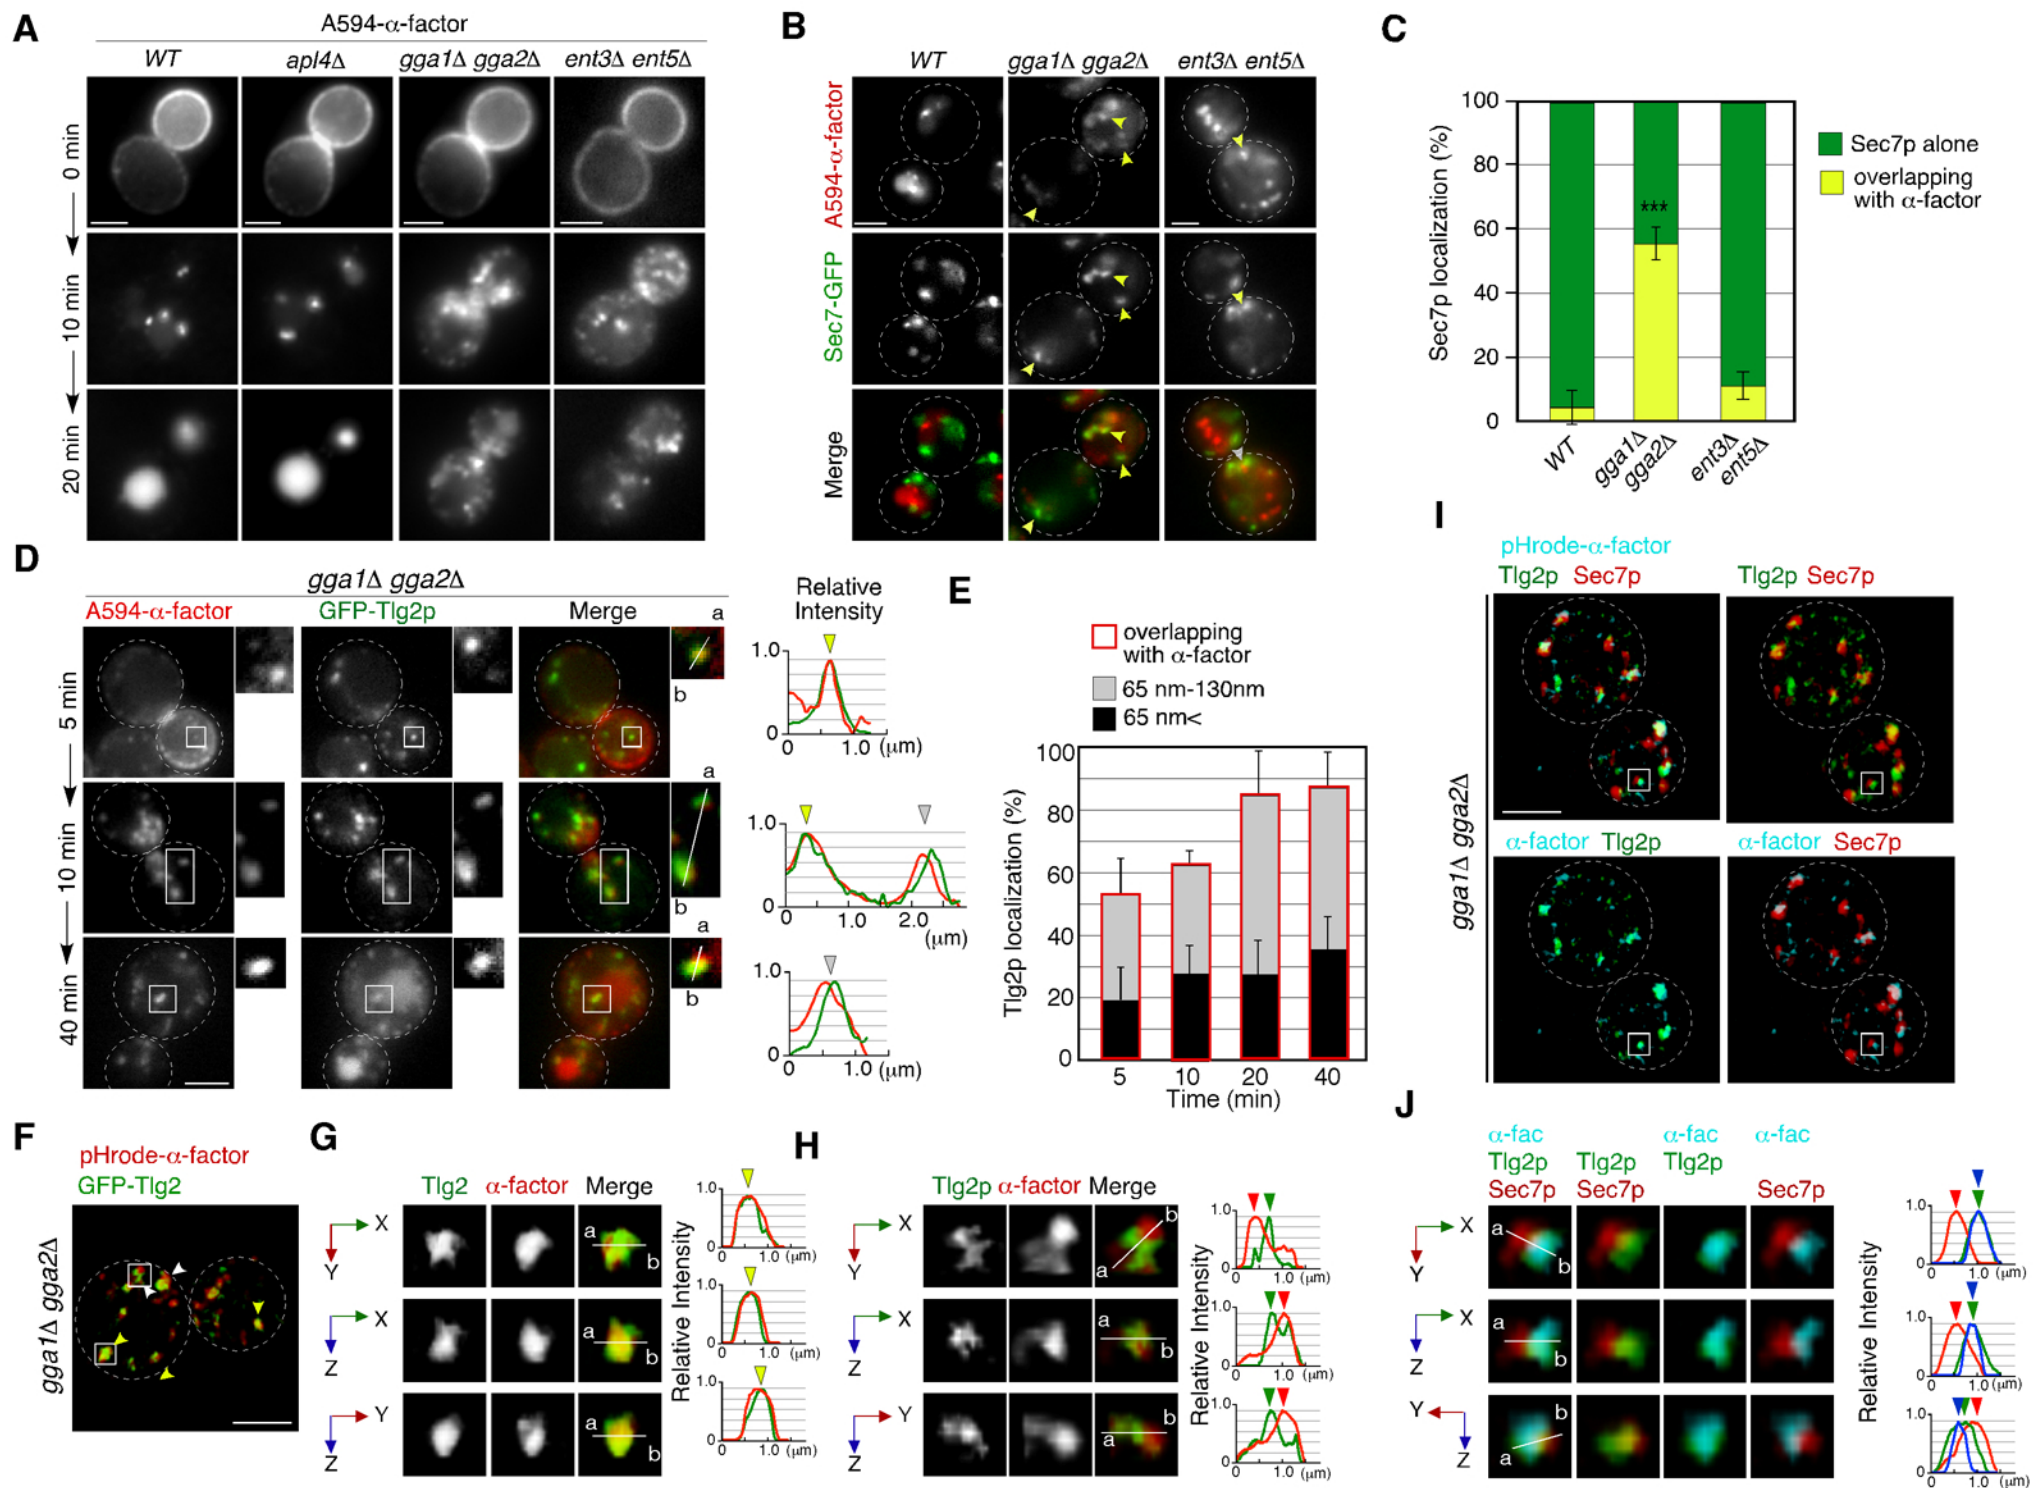

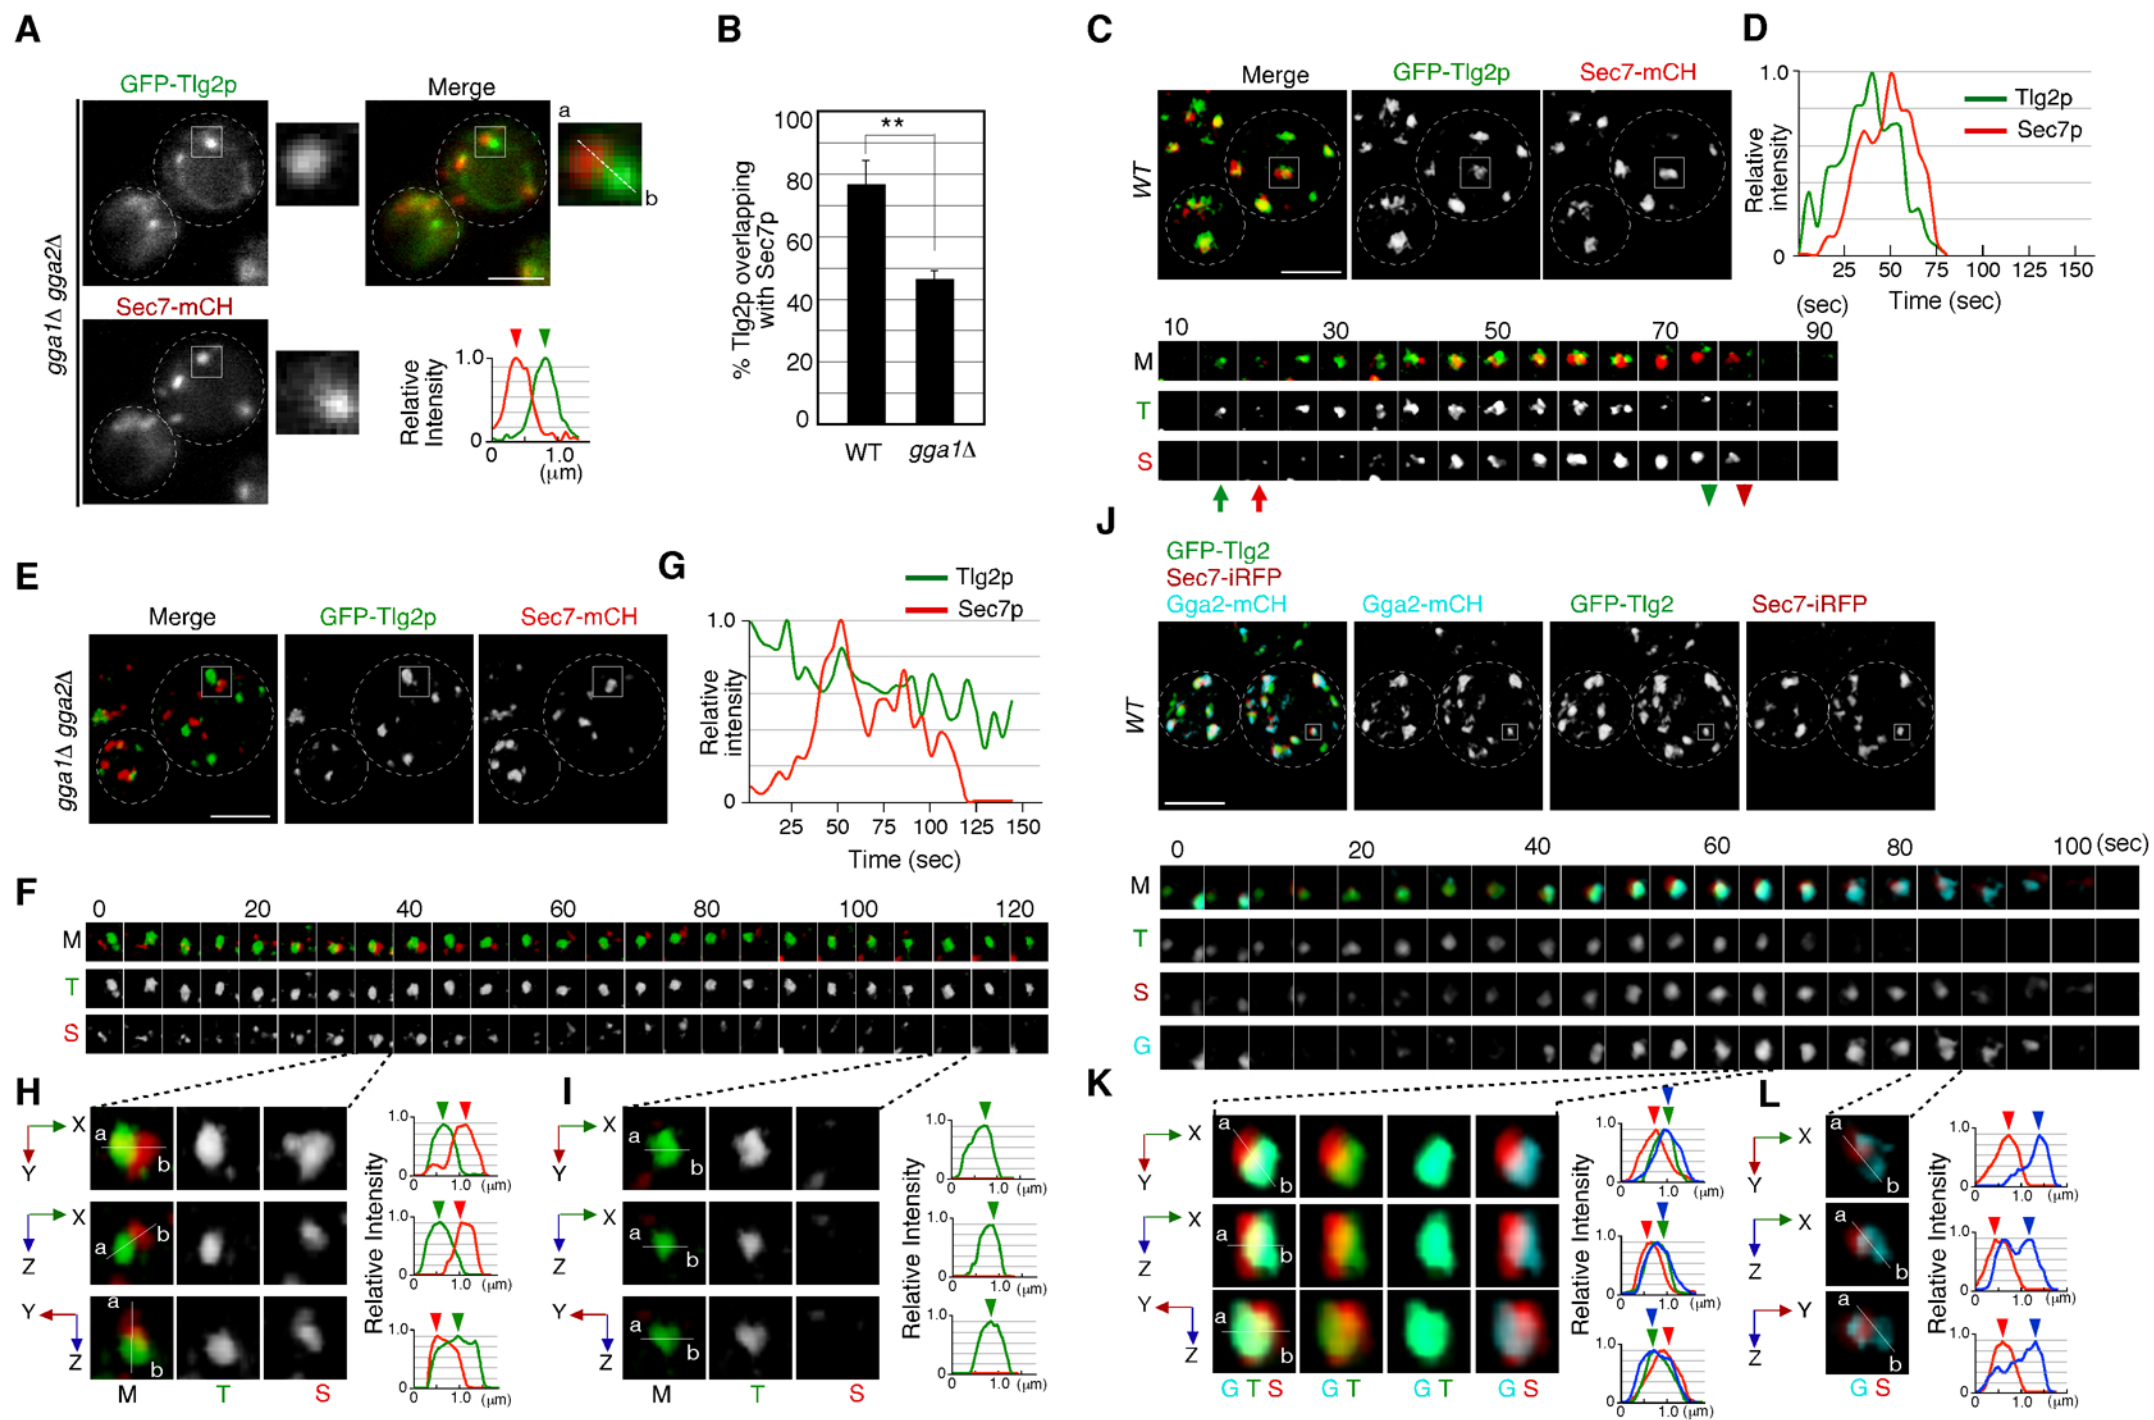

Figure 5. Toshima et al.



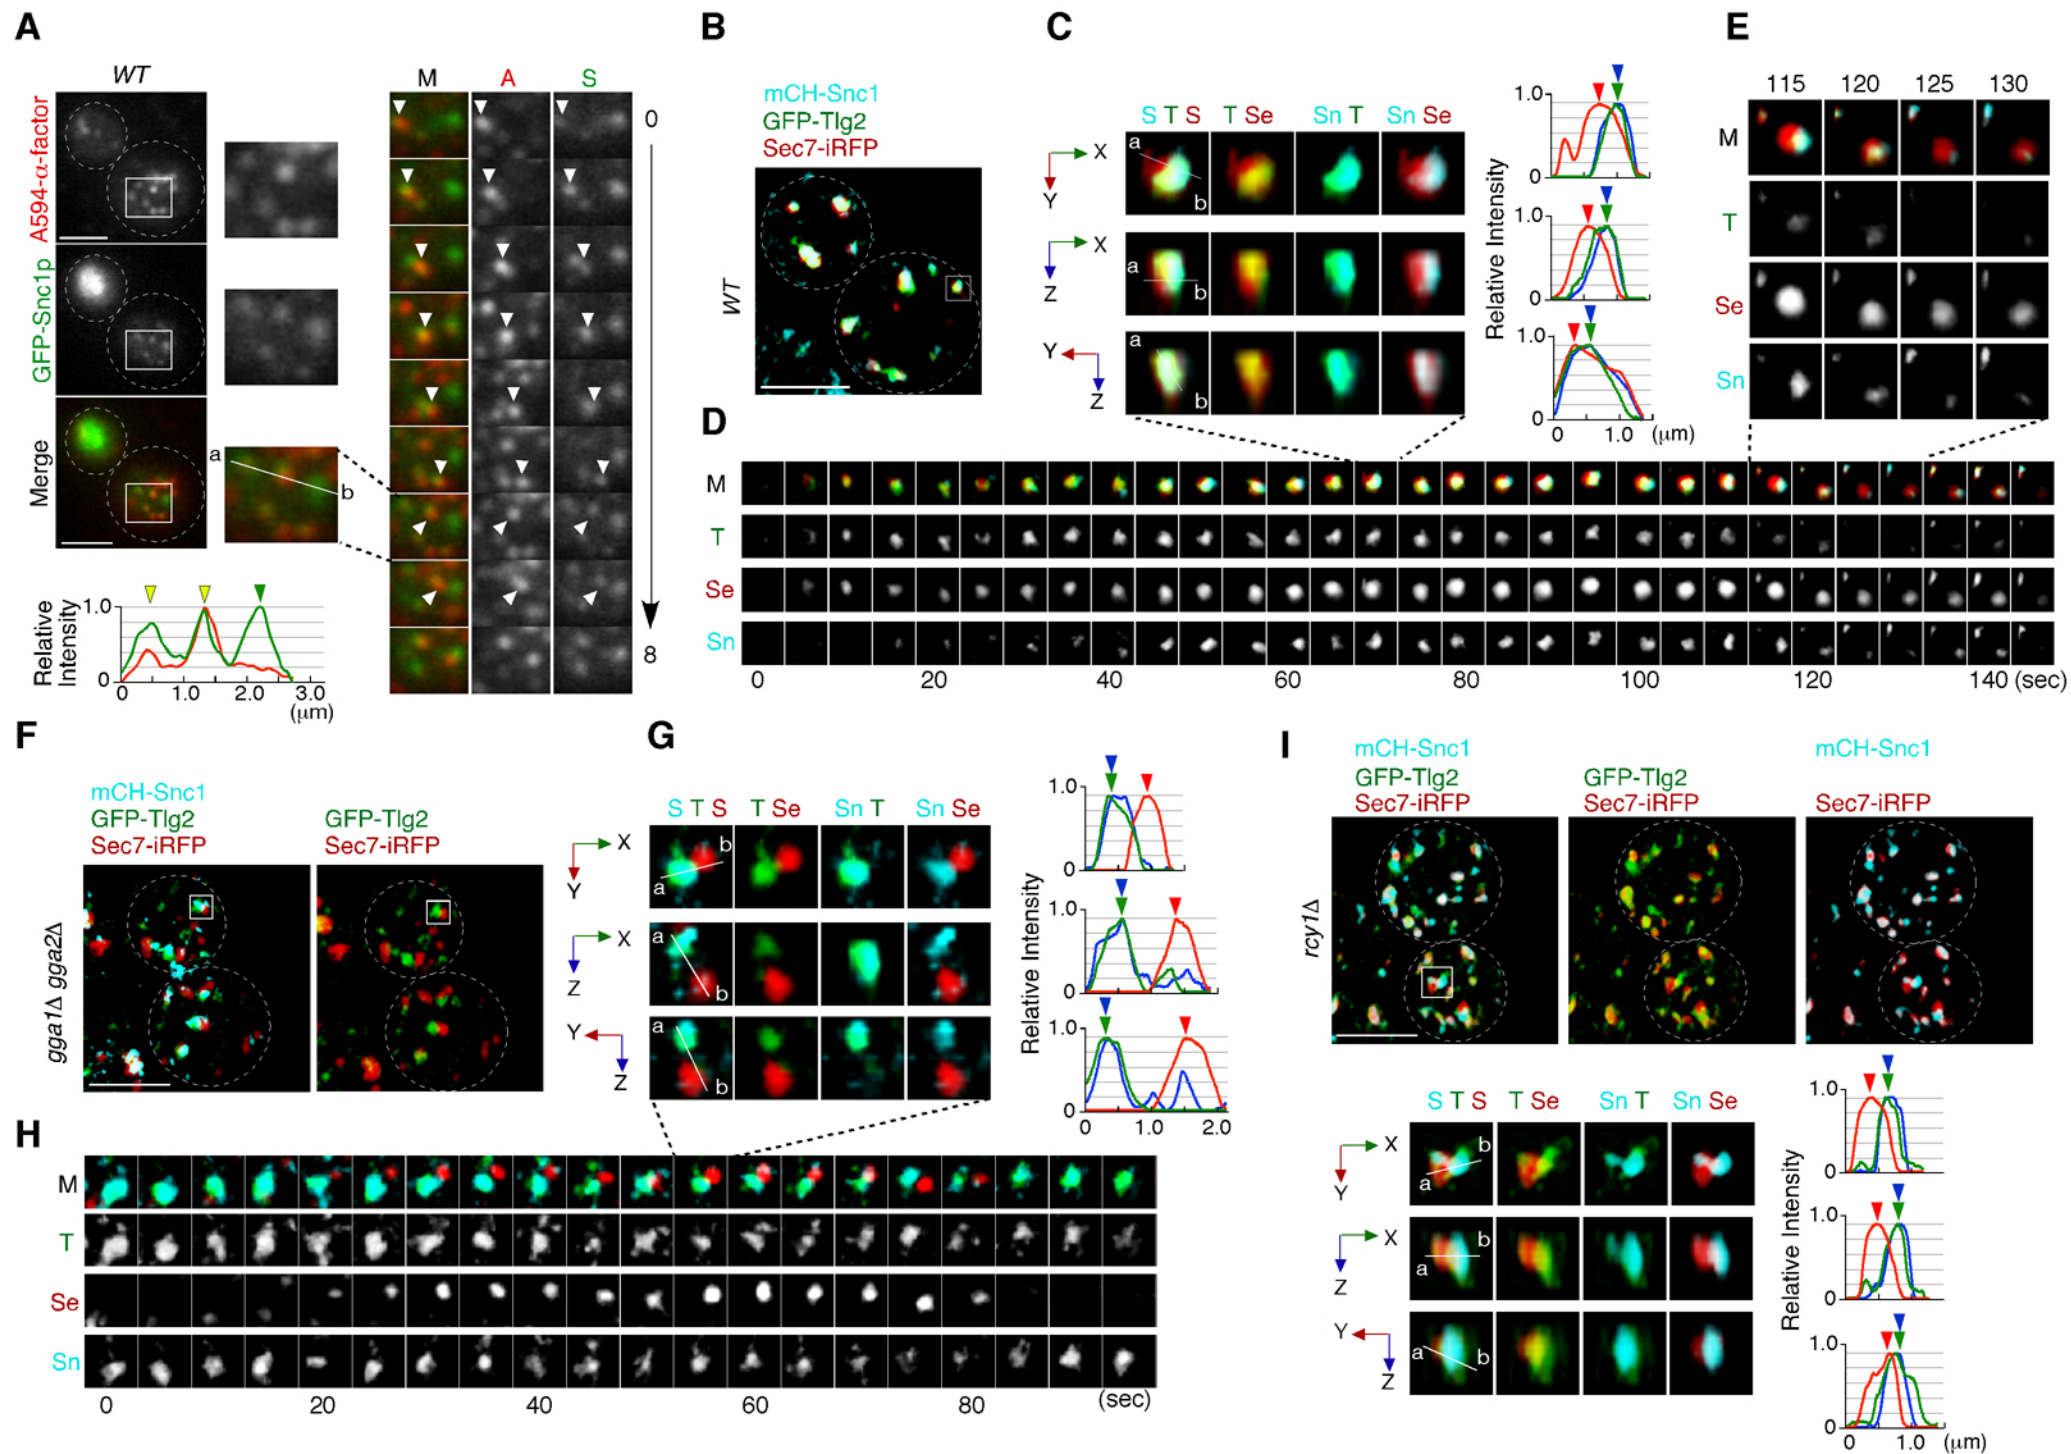

Figure 6. Toshima et al.

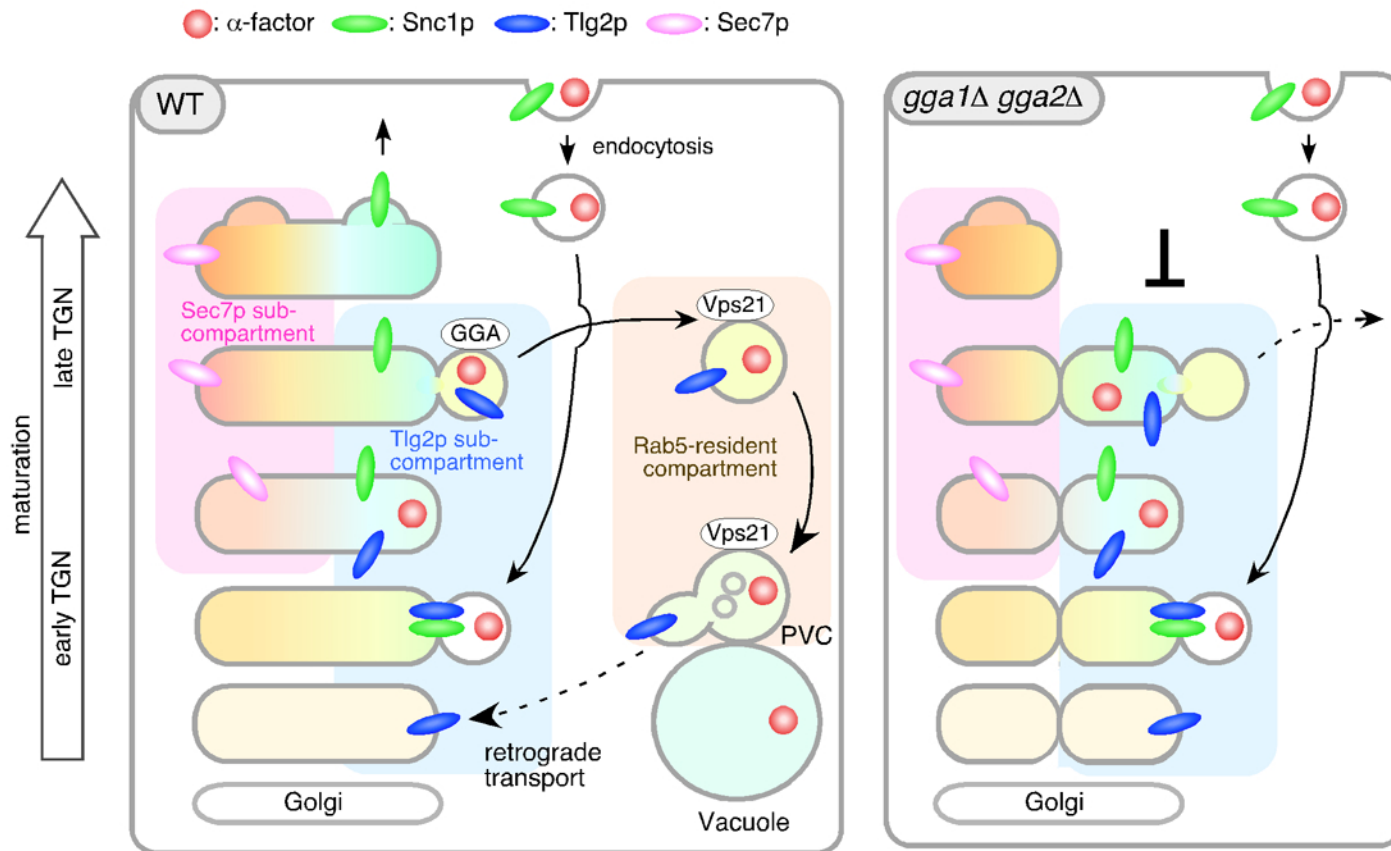

Figure 7. Toshima et al.

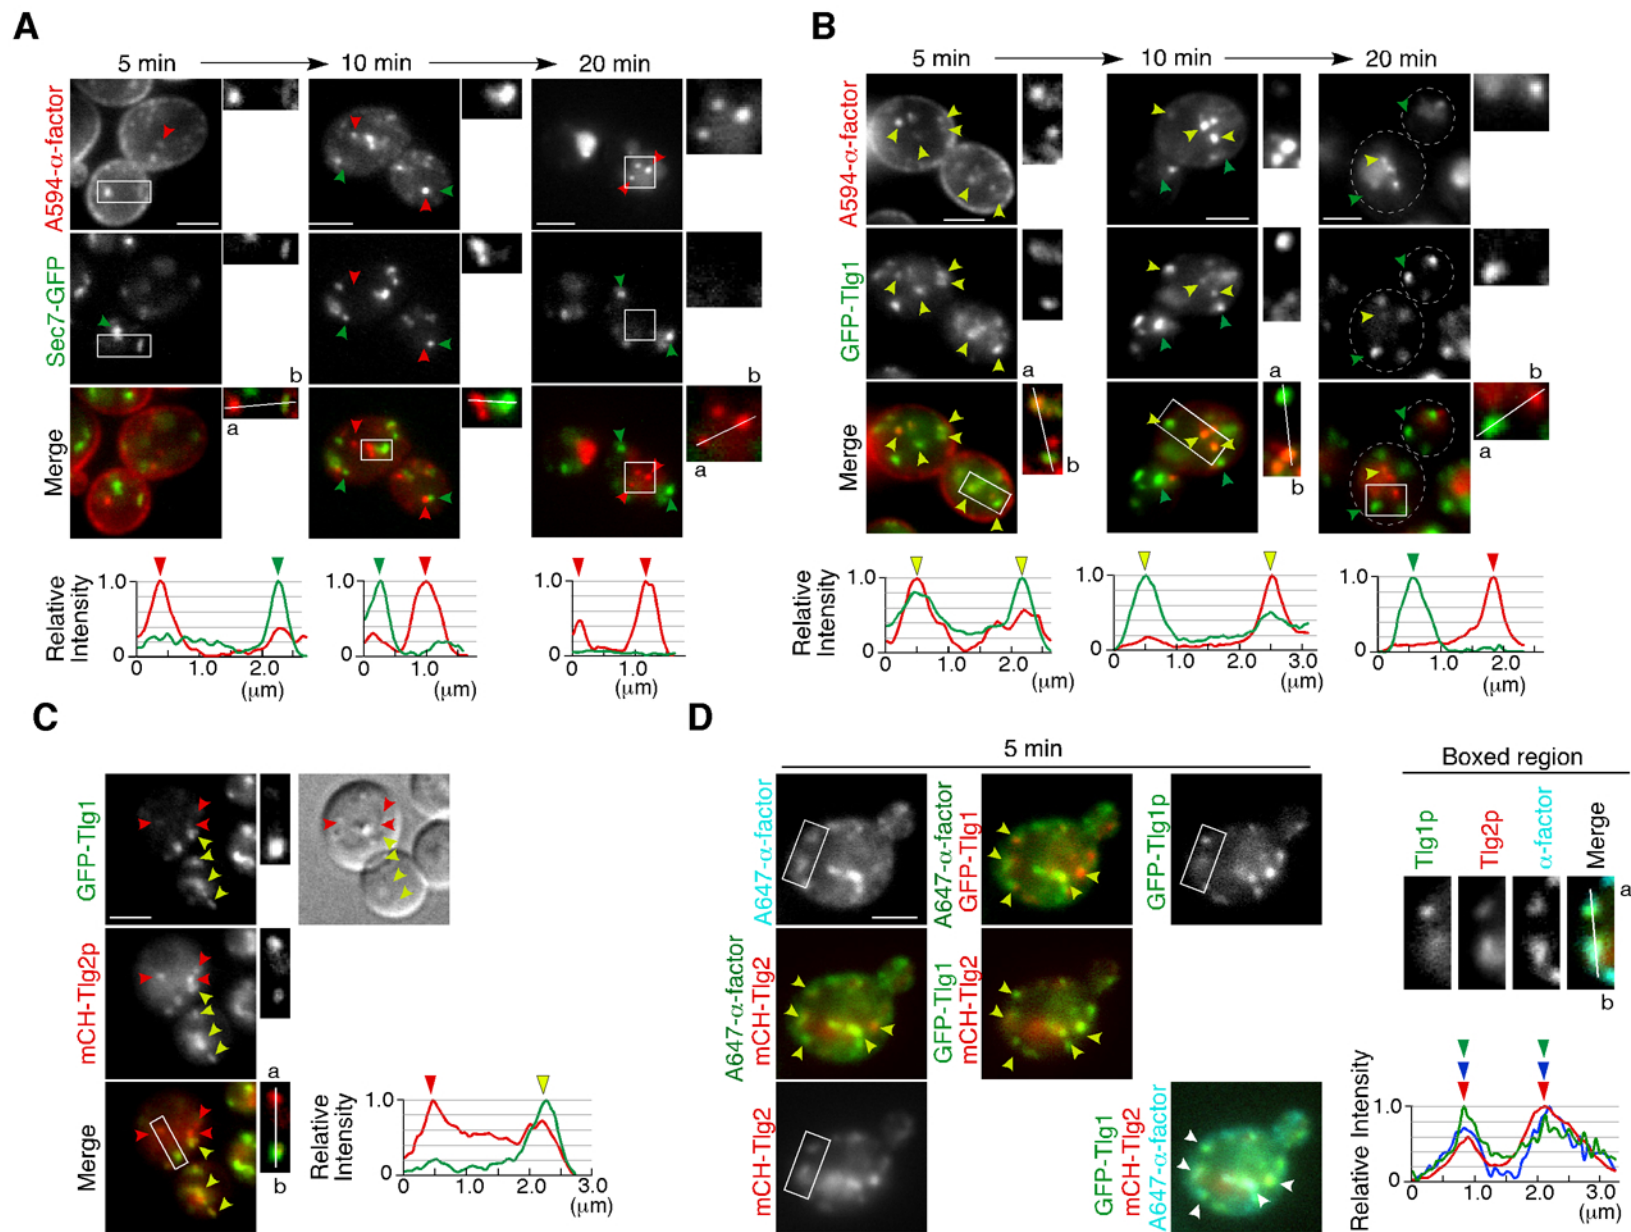

Figure S1. Toshima et al.

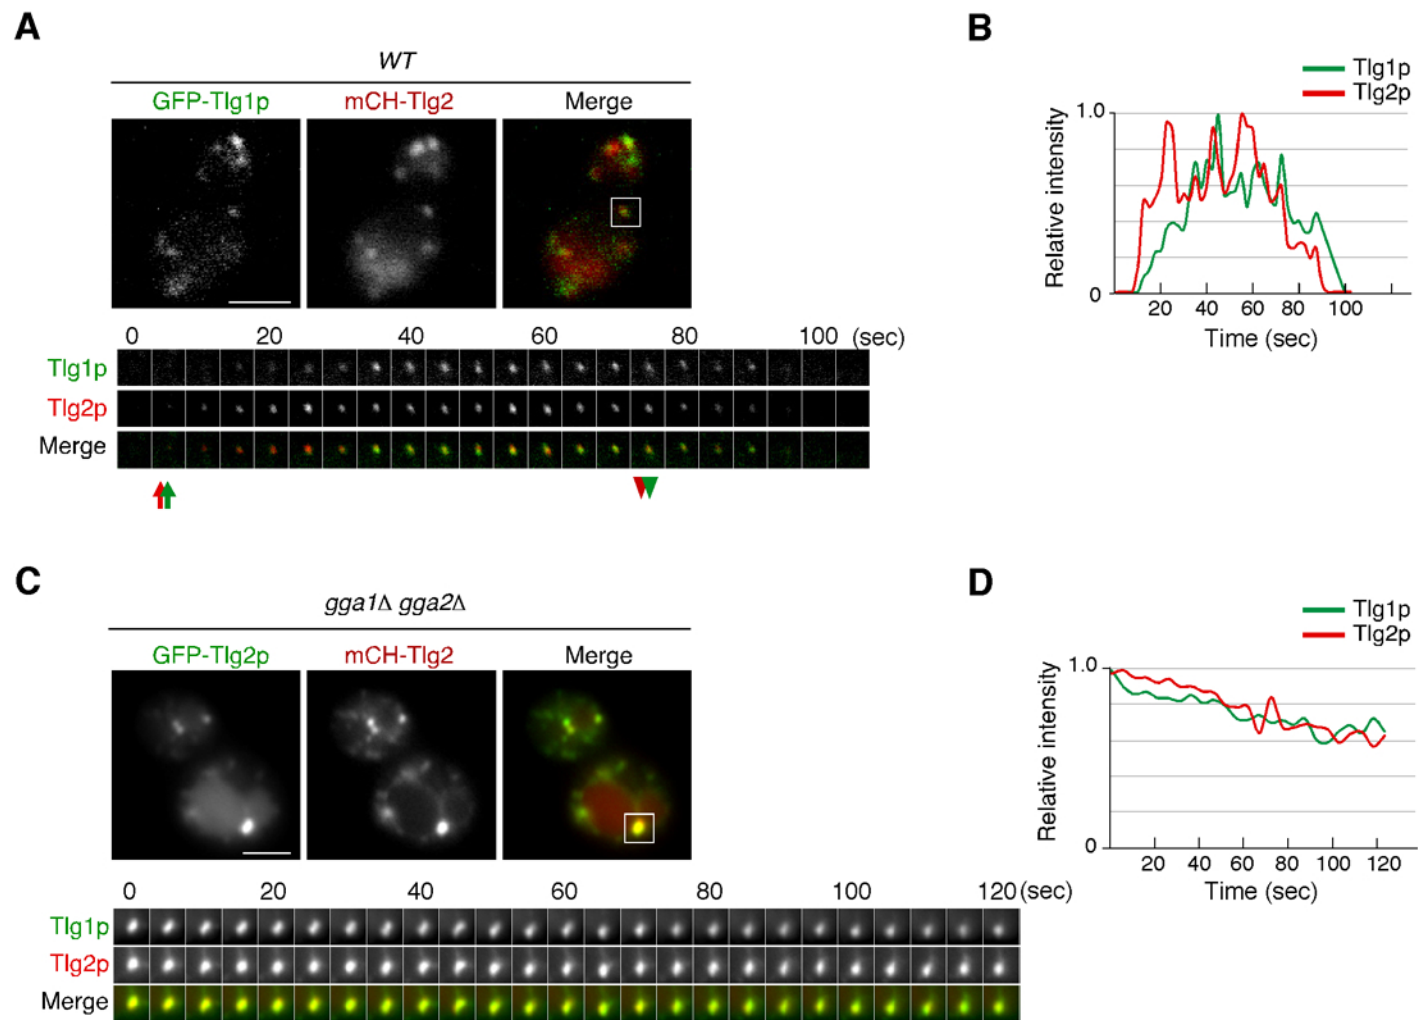

Figure S2. Toshima et al.

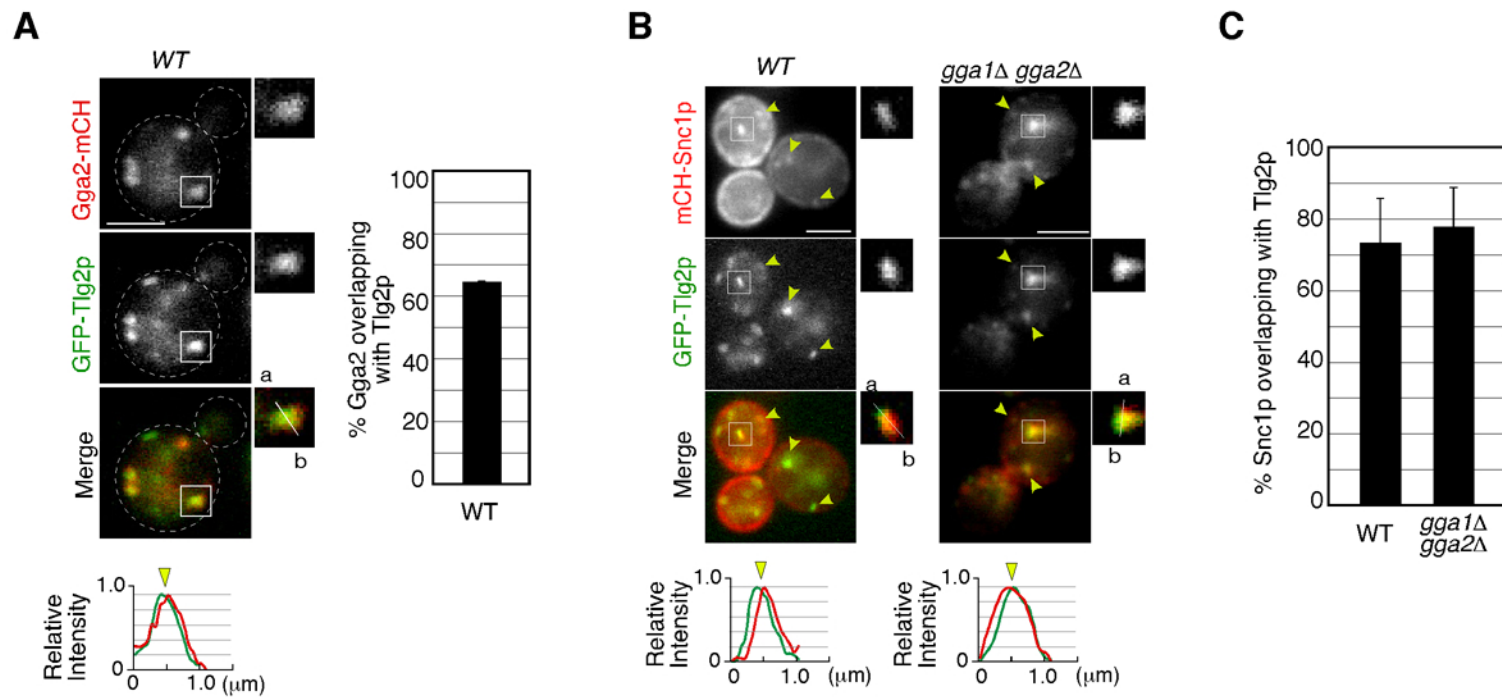

Figure S3. Toshima et al.
